# Supplementary material for: Metallophosphors of platinum with distinct main-group elements: a versatile approach towards color tuning and white-light emission with superior efficiency/color quality/brightness trade-offs
Source: Royal Society of Chemistry journal article supplement (doi:10.1039/c0jm01159b), 2010-01-01
Supplement: c0jm01159b.pdf [file c0jm01159b.pdf]

# **Electronic Supplementary Information**

**for**

**Metallophosphors of platinum with distinct main-group elements: A versatile approach towards color tuning and white-light emission with superior efficiency/color quality/brightness trade-offs**

G.-J. Zhou,\* Q. Wang, C.-L. Ho, W.-Y. Wong,\* D.-G. Ma,\* L.-X. Wang, and Z.-Y. Lin

## Synthesis details

The compounds (4-bromophenyl)diphenylamine,<sup>S1</sup> 1-bromo-4-phenoxybenzene,<sup>S2</sup> 1-bromo-4-phenylsulfanylbenezene,<sup>S3</sup> and (4-iodophenyl)-bis(2,4,6-trimethylphenyl)borane<sup>S4</sup> were synthesized following the literature methods and the synthetic routes are shown in Scheme S1.

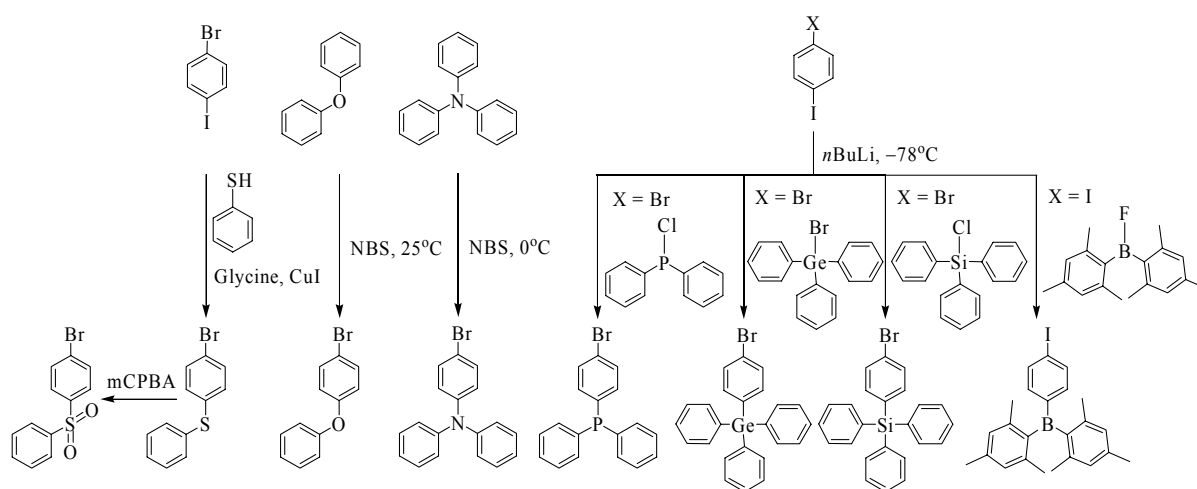

**Scheme S1.** The synthesis of the main-group element-bridged aryl halides.

**Synthesis of (4-bromophenyl)diphenylphosphine.** Under a  $N_2$  atmosphere, *n*-butyllithium (1.6 M in hexane) (8.12 mL, 12.99 mmol) was added slowly to a solution of 1-bromo-4-iodobenzene (3.50 g, 12.37 mmol) in dry ether (50 mL) at  $-78^\circ C$ . After the addition, the reaction mixture was maintained at  $-78^\circ C$  for 45 min. Then, chlorodiphenylphosphine (2.73 g, 12.37 mmol) was added to the reaction flask with a syringe at the same temperature. The reaction mixture was allowed to warm to room temperature (rt) and was stirred overnight. Water (20 mL) was added and the mixture was stirred for 30 min. The mixture was subsequently extracted with  $CH_2Cl_2$  ( $3 \times 50$  mL). The combined organic phase was washed with water ( $3 \times 100$  mL). The organic phase was separated and dried over  $MgSO_4$ . The solvent was removed

under reduced pressure and the residue was purified by column chromatography eluting with hexane. The product was obtained as a white crystalline solid (3.21 g, 76%). Further purification can be achieved by recrystallization from hexane.  $^1\text{H}$  NMR (400 MHz,  $\text{CDCl}_3$ ):  $\delta$  (ppm) 7.48–7.46 (m, 2H, Ar), 7.38–7.29 (m, 10H, Ar), 7.19–7.15 (m, 2H, Ar);  $^{31}\text{P}$  NMR (161.9 MHz,  $\text{CDCl}_3$ ):  $\delta$  (ppm) –5.51. FAB-MS ( $m/z$ ): 341  $[\text{M}]^+$ ; elemental analysis calcd (%) for  $\text{C}_{18}\text{H}_{14}\text{BrP}$ : C 63.37, H 4.14; found: C 63.10, H 3.99.

**Synthesis of (4-bromophenyl)triphenylsilane.** To a solution of 1-bromo-4-iodobenzene (4.00 g, 14.14 mmol) in dry ether (80 mL), *n*-butyllithium (1.6 M in hexane, 9.28 mL, 14.85 mmol) was added slowly at  $-78^\circ\text{C}$  under  $\text{N}_2$  atmosphere. After the addition, the reaction mixture was kept at  $-78^\circ\text{C}$  for 45 min. Then, chlorotriphenylsilane (4.17 g, 14.14 mmol) was added to the reaction flask in one portion at the same temperature. The reaction mixture was allowed to warm to rt slowly and stirred overnight. Water (20 mL) was added and the mixture was stirred for 45 min. The mixture was then extracted with  $\text{CH}_2\text{Cl}_2$  ( $3 \times 60$  mL). The combined organic phase was washed with water ( $3 \times 150$  mL). The organic phase was separated and dried over  $\text{MgSO}_4$ . The solvent was removed under reduced pressure and the residue was purified by column chromatography using hexane/ $\text{CH}_2\text{Cl}_2$  (15:1, v/v) as eluent. The product was obtained as white crystals (3.52 g, 60%).  $^1\text{H}$  NMR (400 MHz,  $\text{CDCl}_3$ ):  $\delta$  (ppm) 7.56–7.50 (m, 8H, Ar), 7.47–7.36 (m, 11H, Ar);  $^{13}\text{C}$  NMR (67.5 MHz,  $\text{CDCl}_3$ ):  $\delta$  (ppm) 137.80, 136.19, 133.49, 133.16, 130.98, 129.69, 127.88, 124.64 (Ar); FAB-MS ( $m/z$ ): 415  $[\text{M}]^+$ ; elemental analysis calcd (%) for  $\text{C}_{24}\text{H}_{19}\text{BrSi}$ : C 69.39, H 4.61; found: C 69.20, H 4.48.

**Synthesis of (4-bromophenyl)triphenylgermanium.** Under a  $\text{N}_2$  atmosphere, *n*-butyllithium (1.6 M in hexane) (6.96 mL, 11.13 mmol) was added slowly at  $-78^\circ\text{C}$  to a solution of 1-bromo-4-iodobenzene (3.00 g, 10.60 mmol) in dry ether (50 mL). After the

addition, the reaction mixture was kept at  $-78^{\circ}\text{C}$  for 45 min. Chlorotriphenylgermanium (4.07 g, 10.60 mmol) was then added to the reaction flask in one portion at the same temperature. The reaction mixture was allowed to warm to rt slowly and stirred overnight. Water (40 mL) was added and the mixture was stirred for 45 min. After the mixture was extracted with  $\text{CH}_2\text{Cl}_2$  ( $3 \times 60$  mL), the combined organic phase was washed with water ( $3 \times 150$  mL). The organic phase was separated and dried over  $\text{MgSO}_4$ . The solvent was removed under reduced pressure and the residue was purified by column chromatography with hexane/ $\text{CH}_2\text{Cl}_2$  (12:1, v/v) as the eluent. The product was obtained as white crystals (3.75 g, 77%).  $^1\text{H}$  NMR (270 MHz,  $\text{CDCl}_3$ ):  $\delta$  (ppm) 7.54–7.51 (m, 8H, Ar), 7.43–7.24 (m, 11H, Ar);  $^{13}\text{C}$  NMR (67.5 MHz,  $\text{CDCl}_3$ ):  $\delta$  (ppm) 136.82, 135.78, 135.17, 135.04, 131.31, 129.20, 128.28, 123.99 (Ar); FAB-MS ( $m/z$ ): 460  $[\text{M}]^+$ ; elemental analysis calcd (%) for  $\text{C}_{24}\text{H}_{19}\text{BrGe}$ : C 62.68, H 4.16; found: C 62.55, H 4.20.

**Synthesis of 1-benzenesulfonyl-4-bromobenzene.** *m*-Chloroperoxybenzoic acid (1.47 g, 8.51 mmol) was added slowly to a solution of 1-bromo-4-phenylsulfanylbenzene (0.50 g, 1.89 mmol) in chloroform (50 mL) at  $0^{\circ}\text{C}$ . After the addition, the reaction mixture was warmed to rt slowly and stirred for 2 days to ensure completion of the reaction. Chloroform (50 mL) was added and the mixture was washed with 2 M sodium thiosulfate solution ( $3 \times 100$  mL) and water ( $3 \times 100$  mL) successively. The organic phase was separated and dried over  $\text{MgSO}_4$ . The solvent was removed under reduced pressure and the residue was purified by column chromatography using  $\text{CH}_2\text{Cl}_2$  as eluent. The product was obtained as white crystals (0.45 g, 80%).  $^1\text{H}$  NMR (270 MHz,  $\text{CDCl}_3$ ):  $\delta$  (ppm) 7.93–7.91 (m, 2H, Ar), 7.80–7.78 (m, 2H, Ar), 7.63–7.48 (m, 5H, Ar);  $^{13}\text{C}$  NMR (67.5 MHz,  $\text{CDCl}_3$ ):  $\delta$  (ppm) 140.98, 140.53, 133.40, 132.50, 129.34, 129.09, 128.36, 127.54 (Ar); FAB-MS ( $m/z$ ): 297  $[\text{M}]^+$ ; elemental analysis calcd (%) for  $\text{C}_{12}\text{H}_9\text{BrSO}_2$ : C 48.50, H 3.05; found: C 48.24, H 2.96.

## **Synthesis of 2-(4-diphenylphosphinophenyl)pyridine.**

(4-Bromophenyl)diphenyl-phosphine (0.50 g, 1.47 mmol) and 2-(tributylstannyl)pyridine (0.60 g, 1.62 mmol) were mixed in dry toluene (50 mL) under a N<sub>2</sub> atmosphere, and Pd(PPh<sub>3</sub>)<sub>4</sub> (85 mg, 0.074 mmol) was then added to the solution. The resulting mixture was stirred at 110 °C for 24 h. After cooling to rt, the reaction mixture was poured into a separating funnel and CH<sub>2</sub>Cl<sub>2</sub> (200 mL) was added followed by washing with water (3 × 100 mL). The organic phase was dried over MgSO<sub>4</sub>. The solvent was then removed and the residue was purified by column chromatography eluting with CH<sub>2</sub>Cl<sub>2</sub>/hexane (3:1, v/v). The title product was obtained as a white semi-solid (0.33 g, 65%). <sup>1</sup>H NMR (270 MHz, CDCl<sub>3</sub>): δ (ppm) 8.59 (d, *J* = 3.8 Hz, 1H, Ar), 7.86 (d, *J* = 8.6 Hz, 2H, Ar), 7.65–7.59 (m, 2H, Ar), 7.34–7.12 (m, 13H, Ar); <sup>31</sup>P NMR (161.9 MHz, CDCl<sub>3</sub>): δ (ppm) –4.96; FAB-MS (*m/z*): 339 [M]<sup>+</sup>; elemental analysis calcd (%) for C<sub>23</sub>H<sub>18</sub>NP: C 81.40, H 5.35, N 4.13; found: C 81.22, H 5.18, N 4.08.

**Synthesis of L-PO.** 2-(4-Diphenylphosphinophenyl)pyridine (0.57 g, 1.68 mmol) was dissolved in CH<sub>2</sub>Cl<sub>2</sub> (20 mL). Then, 30% H<sub>2</sub>O<sub>2</sub> (0.25 mL) was added. The reaction mixture was stirred vigorously for 10 min and water (20 mL) was poured into the reaction flask. After the mixture was extracted with CH<sub>2</sub>Cl<sub>2</sub> (3 × 50 mL), the combined organic phase was dried over MgSO<sub>4</sub>. The solvent was removed under vacuum and the desired product was obtained as a viscous oil which gradually crystallized on standing (0.58 g, 97%). <sup>1</sup>H NMR (400 MHz, CDCl<sub>3</sub>): δ (ppm) 8.64–8.62 (m, 1H, Ar), 8.05–8.02 (m, 2H, Ar), 7.76–7.62 (m, 8H, Ar), 7.51–7.38 (m, 6H, Ar), 7.21–7.18 (m, 1H, Ar); <sup>31</sup>P NMR (161.9 MHz, CDCl<sub>3</sub>): δ (ppm) 30.10; FAB-MS (*m/z*): 355 [M]<sup>+</sup>; elemental analysis calcd (%) for C<sub>23</sub>H<sub>18</sub>NOP: C 77.74, H 5.11, N 3.94; found: C 77.60, H 5.15, N 3.77.

**Synthesis of L-SO<sub>2</sub>.** Under an inert atmosphere, 1-benzenesulfonyl-4-bromobenzene (0.53 g, 1.78 mmol) and 2-(tributylstannyl)pyridine (0.72 g, 1.96 mmol) were mixed in dry toluene (30 mL). Pd(PPh<sub>3</sub>)<sub>4</sub> (100 mg, 0.087 mmol) was added as a catalyst for the Stille coupling reaction. The reaction was then allowed to proceed at 110 °C for 24 h. After cooling to rt, the reaction mixture was poured into a separating funnel and CH<sub>2</sub>Cl<sub>2</sub> (100 mL) was added. The mixture was washed with water (3 × 100 mL). The organic phase was dried over MgSO<sub>4</sub>. The solvent was then removed and the residue was purified by column chromatography eluting with CH<sub>2</sub>Cl<sub>2</sub>/ethyl acetate (30:1, v/v). The title product was obtained as a white solid (0.44 g, 83%). <sup>1</sup>H NMR (400 MHz, CDCl<sub>3</sub>): δ (ppm) 8.71 (d, *J* = 4.8 Hz, 1H, Ar), 8.13 (d, *J* = 8.4 Hz, 2H, Ar), 8.04 (d, *J* = 8.8 Hz, 2H, Ar), 7.98–7.96 (m, 2H, Ar), 7.81–7.74 (m, 2H, Ar), 7.59–7.49 (m, 3H, Ar), 7.32–7.29 (m, 1H, Ar); <sup>13</sup>C NMR (100 MHz, CDCl<sub>3</sub>): δ (ppm) 155.28, 149.99, 143.97, 141.55, 141.49, 137.02, 133.21, 129.28, 128.14, 127.71, 127.61, 123.26, 121.05 (Ar); FAB-MS (*m/z*): 295 [M]<sup>+</sup>; elemental analysis calcd (%) for C<sub>17</sub>H<sub>13</sub>NO<sub>2</sub>S: C 69.13, H 4.44, N 4.74; found: C 69.20, H 4.29, N 4.56.

**Synthesis of L-S.** Under an inert atmosphere, 1-bromo-4-phenylsulfanylbenzene (0.55 g, 2.07 mmol) and 2-(tributylstannyl)pyridine (0.84 g, 2.28 mmol) were mixed in dry toluene (35 mL). Pd(PPh<sub>3</sub>)<sub>4</sub> (116 mg, 0.10 mmol) was added as a catalyst for the Stille coupling reaction. The reaction was allowed to proceed at 110 °C for 24 h. After cooling to rt, the reaction mixture was poured into a separating funnel and CH<sub>2</sub>Cl<sub>2</sub> (150 mL) was added. The mixture was washed with water (3 × 100 mL). The organic phase was dried over MgSO<sub>4</sub>. The solvent was then removed and the residue was purified by column chromatography eluting with CH<sub>2</sub>Cl<sub>2</sub>/hexane (5:1, v/v). The title product was obtained as a white solid (0.37 g, 67%). <sup>1</sup>H NMR (400 MHz, CDCl<sub>3</sub>): δ (ppm) 8.69–8.67 (m, 1H, Ar), 7.92 (d, *J* = 8.0 Hz, 2H, Ar), 7.77–7.69 (m, 2H, Ar),

7.42–7.39 (m, 4H, Ar), 7.35–7.21 (m, 4H, Ar);  $^{13}\text{C}$  NMR (100 MHz,  $\text{CDCl}_3$ ):  $\delta$  (ppm) 156.58, 149.68, 137.89, 137.24, 136.79, 135.07, 131.47, 130.69, 129.27, 127.54, 127.34, 122.19, 120.33 (Ar); FAB-MS ( $m/z$ ): 263  $[\text{M}]^+$ ; elemental analysis calcd (%) for  $\text{C}_{17}\text{H}_{13}\text{NS}$ : C 77.53, H 4.98, N 5.32; found: C 77.39, H 5.03, N 5.10.

**Synthesis of L-O.** Under an inert atmosphere, 1-bromo-4-phenoxybenzene (0.60 g, 2.41 mmol) and 2-(tributylstannyl)pyridine (0.98 g, 2.65 mmol) were mixed in dry toluene (40 mL).  $\text{Pd}(\text{PPh}_3)_4$  (139 mg, 0.12 mmol) was added and the reaction was allowed to proceed at 110 °C for 24 h. After cooling to rt, the reaction mixture was poured into a separating funnel and  $\text{CH}_2\text{Cl}_2$  (150 mL) was added. The mixture was washed with water ( $3 \times 100$  mL). The organic phase was dried over  $\text{MgSO}_4$ . The solvent was then removed and the residue was purified by column chromatography eluting with  $\text{CH}_2\text{Cl}_2$ /hexane (4:1, v/v). The title product was obtained as a white solid (0.45 g, 76%).  $^1\text{H}$  NMR (400 MHz,  $\text{CDCl}_3$ ):  $\delta$  (ppm) 8.68–8.67 (m, 1H, Ar), 7.93 (m, 2H, Ar), 7.76–7.68 (m, 2H, Ar), 7.37 (t,  $J = 8.0$  Hz, 2H, Ar), 7.22–7.06 (m, 6H, Ar);  $^{13}\text{C}$  NMR (100 MHz,  $\text{CDCl}_3$ ):  $\delta$  (ppm) 158.19, 156.78, 149.58, 136.71, 134.36, 129.78, 128.37, 126.86, 123.51, 121.74, 120.07, 119.13, 118.77 (Ar); FAB-MS ( $m/z$ ): 247  $[\text{M}]^+$ ; elemental analysis calcd (%) for  $\text{C}_{17}\text{H}_{13}\text{NO}$ : C 82.57, H 5.30, N 5.66; found: C 82.44, H 5.19, N 5.70.

**Synthesis of L-N.** Under a  $\text{N}_2$  atmosphere, (4-bromophenyl)diphenylamine (0.65 g, 2.00 mmol) and 2-(tributylstannyl)pyridine (0.81 g, 2.20 mmol) were added in dry toluene (35 mL) in the presence of  $\text{Pd}(\text{PPh}_3)_4$  (116 mg, 0.10 mmol). The reaction was allowed to proceed at 110 °C for 24 h. After cooling to rt, the reaction mixture was poured into a separating funnel and  $\text{CH}_2\text{Cl}_2$  (150 mL) was added. The mixture was washed with water ( $3 \times 100$  mL) and the organic phase was dried over  $\text{MgSO}_4$ . The solvent was then removed and the residue was purified by column chromatography eluting with  $\text{CH}_2\text{Cl}_2$ /hexane (3:1, v/v). The title product was obtained

as a white solid (0.48 g, 75%).  $^1\text{H}$  NMR (400 MHz,  $\text{CDCl}_3$ ):  $\delta$  (ppm) 8.66–8.64 (m, 1H, Ar), 7.88–7.85 (m, 2H, Ar), 7.73–7.65 (m, 2H, Ar), 7.30–7.25 (m, 4H, Ar), 7.19–7.12 (m, 7H, Ar), 7.07–7.03 (m, 2H, Ar);  $^{13}\text{C}$  NMR (100 MHz,  $\text{CDCl}_3$ ):  $\delta$  (ppm) 157.05, 149.56, 148.66, 147.45, 136.62, 133.09, 129.28, 127.70, 124.70, 123.19, 121.44, 119.84 (Ar); FAB-MS ( $m/z$ ): 322  $[\text{M}]^+$ ; elemental analysis calcd (%) for  $\text{C}_{23}\text{H}_{18}\text{N}_2$ : C 85.68, H 5.63, N 8.69; found: C 85.52, H 5.47, N 8.65.

**Synthesis of L-Ge.** Under a  $\text{N}_2$  atmosphere, (4-bromophenyl)triphenylgermanium (0.50 g, 1.09 mmol) and 2-(tributylstannyl)pyridine (0.44 g, 1.20 mmol) were added in dry toluene (35 mL) in the presence of  $\text{Pd}(\text{PPh}_3)_4$  (64 mg, 0.055 mmol). The reaction was allowed to proceed at 110 °C for 24 h. After cooling to rt, the reaction mixture was poured into a separating funnel and  $\text{CH}_2\text{Cl}_2$  (150 mL) was added. The mixture was washed with water ( $3 \times 100$  mL). The organic phase was dried over  $\text{MgSO}_4$ . The solvent was then removed and the residue was purified by column chromatography eluting with  $\text{CH}_2\text{Cl}_2$ /hexane (3:1, v/v). The title product was obtained as a white solid (0.40 g, 81%).  $^1\text{H}$  NMR (270 MHz,  $\text{CDCl}_3$ ):  $\delta$  (ppm) 8.70 (d,  $J = 4.6$  Hz, 1H, Ar), 8.00 (d,  $J = 7.8$  Hz, 2H, Ar), 7.75–7.54 (m, 10H, Ar), 7.45–7.36 (m, 9H, Ar), 7.25–7.20 (m, 1H, Ar);  $^{13}\text{C}$  NMR (67.5 MHz,  $\text{CDCl}_3$ ):  $\delta$  (ppm) 157.23, 149.61, 140.02, 136.99, 136.62, 135.84, 135.73, 135.27, 129.05, 128.19, 126.54, 122.14, 120.55 (Ar); FAB-MS ( $m/z$ ): 459  $[\text{M}]^+$ ; elemental analysis calcd (%) for  $\text{C}_{29}\text{H}_{23}\text{NGe}$ : C 76.04, H 5.06, N 3.06; found: C 75.88, H 5.12, N 2.95.

**Synthesis of L-Si.** Under a  $\text{N}_2$  atmosphere, (4-bromophenyl)triphenylsilane (0.45 g, 1.08 mmol) and 2-(tributylstannyl)pyridine (0.44 g, 1.20 mmol) were added in dry toluene (30 mL) in the presence of  $\text{Pd}(\text{PPh}_3)_4$  (64 mg, 0.055 mmol). The reaction was allowed to proceed at 110 °C for 24 h. After cooling to rt, the reaction mixture was poured into a separating funnel and



CH<sub>2</sub>Cl<sub>2</sub> (150 mL) was added. The mixture was washed with water (3 × 100 mL). The organic phase was dried over MgSO<sub>4</sub>. The solvent was then removed and the residue was purified by column chromatography eluting with CH<sub>2</sub>Cl<sub>2</sub>/hexane (3:1, v/v). The title product was obtained as a white solid (0.29 g, 65%). <sup>1</sup>H NMR (270 MHz, CDCl<sub>3</sub>): δ (ppm) 8.70 (d, *J* = 4.6 Hz, 1H, Ar), 8.00 (d, *J* = 8.1 Hz, 2H, Ar), 7.74–7.59 (m, 10H, Ar), 7.48–7.35 (m, 9H, Ar), 7.25–7.20 (m, 1H, Ar); <sup>13</sup>C NMR (67.6 MHz, CDCl<sub>3</sub>): δ (ppm) 157.19, 149.62, 140.38, 136.75, 136.61, 136.27, 134.99, 133.94, 129.53, 127.80, 126.17, 122.19, 120.61 (Ar); FAB-MS (*m/z*): 413 [M]<sup>+</sup>; elemental analysis calcd (%) for C<sub>29</sub>H<sub>23</sub>NSi: C 84.22, H 5.61, N 3.39; found: C 84.02, H 5.48, N 3.30.

**Synthesis of L-B.** Under a N<sub>2</sub> atmosphere, (4-iodophenyl)-bis(2,4,6-trimethylphenyl)borane (0.55 g, 1.22 mmol) and 2-(tributylstannyl)pyridine (0.49 g, 1.34 mmol) were added in dry toluene (35 mL) in the presence of Pd(PPh<sub>3</sub>)<sub>4</sub> (70 mg, 0.061 mmol). The reaction was allowed to proceed at 110 °C for 24 h. After cooling to rt, the reaction mixture was poured into a separating funnel and CH<sub>2</sub>Cl<sub>2</sub> (150 mL) was added. The mixture was washed with water (3 × 100 mL). The organic phase was dried over MgSO<sub>4</sub>. The solvent was then removed and the residue was purified by column chromatography eluting with CH<sub>2</sub>Cl<sub>2</sub>/hexane (3:1, v/v). The title product was obtained as a white solid (0.33 g, 68%). <sup>1</sup>H NMR (400 MHz, CDCl<sub>3</sub>): δ (ppm) 8.72–8.70 (m, 1H, Ar), 7.97 (d, *J* = 8.4 Hz, 2H, Ar), 7.78–7.76 (m, 2H, Ar), 7.64–7.62 (m, 2H, Ar), 7.27–7.24 (m, 1H, Ar), 6.84 (s, 4H, Ar), 2.32 (s, 6H, Mes), 2.03 (s, 12H, Mes); <sup>13</sup>C NMR (100 MHz, CDCl<sub>3</sub>): δ (ppm) 157.17, 149.76, 146.36, 142.31, 141.69, 140.85, 138.71, 136.78, 128.17, 126.39, 122.47, 121.02 (Ar), 23.45, 21.22 (Mes); FAB-MS (*m/z*): 403 [M]<sup>+</sup>; elemental analysis calcd (%) for C<sub>29</sub>H<sub>30</sub>NB: C 86.35, H 7.50, N 3.47; found: C 86.11, H 7.60, N 3.29.

## References:

- S1 R. Pudzich and J. Salbeck, *Synth. Met.*, 2003, **138**, 21.
- S2 K. Tanemura, T. Suzuki, Y. Nishida, K. Satsumabayashi and T. Horaguchi, *Chem. Lett.*, 2003, **32**, 932.
- S3 W. Deng, Y. Zou, Y.-F. Wang, L. Liu and Q.-X. Guo, *Synlett.*, 2004, **7**, 1254.
- S4 Z. Yuan, C. D. Entwistle, J. C. Collings, D. Albesa-Jové, A. S. Batsanov, J. A. K. Howard, N. J. Taylor, H. M. Kaiser, D. E. Kaufmann, S.-Y. Poon, W.-Y. Wong, C. Jardin, S. Fathallah, A. Boucekkine, J.-F. Halet and T. B. Marder, *Chem. Eur. J.*, 2006, **12**, 2758.

**Table S1** The performance of all electrophosphorescent OLEDs based on our Pt<sup>II</sup> phosphors.

| Device    | Phosphor dopant         | $V_{\text{turn-on}}$<br>/V | Luminance $L$<br>/cd m <sup>-2</sup> | $\eta_{\text{ext}}$<br>/% | $\eta_{\text{L}}$<br>/cd A <sup>-1</sup> | $\eta_{\text{p}}$<br>/lm W <sup>-1</sup> | $\lambda_{\text{max}}$<br>/nm <sup>d</sup> |
|-----------|-------------------------|----------------------------|--------------------------------------|---------------------------|------------------------------------------|------------------------------------------|--------------------------------------------|
| <b>A1</b> | <b>Pt-B</b> (4 wt.-%)   | 6.5                        | 34721 (19.5) <sup>a</sup>            | 9.52 (12.1)               | 30.00 (12.1)                             | 8.36 (10.9)                              | 542, 580                                   |
|           |                         |                            | 4451 <sup>b</sup>                    | 7.06                      | 22.24                                    | 4.55                                     | (0.46, 0.53)                               |
|           |                         |                            | 14004 <sup>c</sup>                   | 4.46                      | 14.03                                    | 2.51                                     |                                            |
| <b>A2</b> | <b>Pt-B</b> (6 wt.-%)   | 6.9                        | 27482 (20.0)                         | 8.71 (12.5)               | 27.43 (12.5)                             | 7.30 (11.5)                              | 542, 580                                   |
|           |                         |                            | 4216                                 | 6.70                      | 21.10                                    | 4.11                                     | (0.46, 0.53)                               |
|           |                         |                            | 13781                                | 4.38                      | 13.80                                    | 2.33                                     |                                            |
| <b>A3</b> | <b>Pt-B</b> (8 wt.-%)   | 7.5                        | 22741 (19.9)                         | 4.66 (13.3)               | 14.68 (13.3)                             | 3.70 (11.5)                              | 542, 580                                   |
|           |                         |                            | 2688                                 | 4.27                      | 13.46                                    | 2.79                                     | (0.46, 0.53)                               |
|           |                         |                            | 9793                                 | 3.12                      | 9.81                                     | 1.76                                     |                                            |
| <b>A4</b> | <b>Pt-B</b> (10 wt.-%)  | 6.7                        | 23754 (15.3)                         | 4.90 (13.3)               | 15.44 (13.3)                             | 3.94 (11.9)                              | 542, 580                                   |
|           |                         |                            | 2876                                 | 4.55                      | 14.34                                    | 3.02                                     | (0.46, 0.53)                               |
|           |                         |                            | 10220                                | 3.25                      | 10.24                                    | 1.88                                     |                                            |
| <b>B1</b> | <b>Pt-Si</b> (4 wt.-%)  | 4.7                        | 14366 (13.9)                         | 2.99 (6.7)                | 7.74 (6.7)                               | 3.63 (6.7)                               | 448, 496, 532,                             |
|           |                         |                            | 1332                                 | 2.58                      | 6.67                                     | 2.18                                     | 572                                        |
|           |                         |                            | 4928                                 | 1.91                      | 4.93                                     | 1.34                                     | (0.28, 0.44)                               |
| <b>B2</b> | <b>Pt-Si</b> (6 wt.-%)  | 4.7                        | 16720 (14.5)                         | 3.43 (7.5)                | 8.27 (7.5)                               | 3.79 (5.9)                               | 446, 496, 532,                             |
|           |                         |                            | 1425                                 | 2.95                      | 7.11                                     | 2.16                                     | 584, 610                                   |
|           |                         |                            | 5433                                 | 2.25                      | 5.43                                     | 1.43                                     | (0.39, 0.44)                               |
| <b>B3</b> | <b>Pt-Si</b> (8 wt.-%)  | 4.5                        | 14957 (14.3)                         | 3.16 (7.1)                | 7.62 (7.1)                               | 3.41 (5.7)                               | 448, 496, 532,                             |
|           |                         |                            | 1307                                 | 2.72                      | 6.56                                     | 2.09                                     | 586, 607                                   |
|           |                         |                            | 4964                                 | 2.06                      | 4.97                                     | 1.33                                     | (0.39, 0.45)                               |
| <b>B4</b> | <b>Pt-Si</b> (10 wt.-%) | 4.3                        | 18156 (13.9)                         | 3.51 (5.7)                | 8.47 (5.7)                               | 4.79 (5.3)                               | 446, 496, 532,                             |
|           |                         |                            | 1407                                 | 2.92                      | 7.04                                     | 2.30                                     | 585, 604                                   |
|           |                         |                            | 5383                                 | 2.24                      | 5.39                                     | 1.46                                     | (0.40, 0.46)                               |
| <b>C1</b> | <b>Pt-Ge</b> (4 wt.-%)  | 4.3                        | 12540 (13.5)                         | 2.64 (5.9)                | 5.98 (5.9)                               | 3.71 (4.9)                               | 450, 492, 528,                             |
|           |                         |                            | 1024                                 | 2.27                      | 5.13                                     | 1.72                                     | 572, 604                                   |
|           |                         |                            | 3968                                 | 1.75                      | 3.97                                     | 1.12                                     | (0.35, 0.41)                               |
| <b>C2</b> | <b>Pt-Ge</b> (6 wt.-%)  | 4.5                        | 12350 (13.7)                         | 2.60 (5.7)                | 6.18 (5.7)                               | 3.64 (5.1)                               | 453, 492, 528,                             |
|           |                         |                            | 1050                                 | 2.21                      | 5.26                                     | 1.77                                     | 576, 601                                   |
|           |                         |                            | 4071                                 | 1.72                      | 4.08                                     | 1.16                                     | (0.36, 0.42)                               |
| <b>C3</b> | <b>Pt-Ge</b> (8 wt.-%)  | 4.5                        | 17153 (14.3)                         | 4.02 (5.1)                | 8.49 (5.1)                               | 5.23 (5.1)                               | 450, 492, 531,                             |
|           |                         |                            | 1258                                 | 2.97                      | 6.29                                     | 2.01                                     | 612                                        |
|           |                         |                            | 4921                                 | 2.33                      | 4.92                                     | 1.33                                     | (0.46, 0.43)                               |
| <b>C4</b> | <b>Pt-Ge</b> (10 wt.-%) | 4.1                        | 15264 (12.7)                         | 4.13 (4.9)                | 8.27 (4.9)                               | 5.48 (4.7)                               | 448, 492, 531,                             |
|           |                         |                            | 1178                                 | 2.95                      | 5.91                                     | 2.14                                     | 609                                        |
|           |                         |                            | 4562                                 | 2.28                      | 4.57                                     | 1.38                                     | (0.47, 0.43)                               |
| <b>D1</b> | <b>Pt-N</b> (4 wt.-%)   | 3.5                        | 11720 (13.9)                         | 8.50 (5.3)                | 29.74 (5.3)                              | 19.73 (4.3)                              | 542, 572                                   |
|           |                         |                            | 2526                                 | 3.62                      | 12.65                                    | 4.26                                     | (0.44, 0.55)                               |

|           |                         |     |              |             |             |             |                |
|-----------|-------------------------|-----|--------------|-------------|-------------|-------------|----------------|
|           |                         |     | 6265         | 1.79        | 6.27        | 1.74        |                |
| <b>D2</b> | <b>Pt-N (6 wt.-%)</b>   | 3.5 | 12607 (13.9) | 7.61 (5.3)  | 26.62 (5.3) | 17.76 (4.5) | 542, 572       |
|           |                         |     | 2499         | 3.58        | 12.54       | 4.30        | (0.44, 0.55)   |
|           |                         |     | 6407         | 1.84        | 6.42        | 1.81        |                |
| <b>D3</b> | <b>Pt-N (8 wt.-%)</b>   | 3.5 | 10494 (13.1) | 6.67 (5.7)  | 23.35 (5.7) | 14.03 (5.1) | 542, 572       |
|           |                         |     | 2213         | 3.17        | 11.09       | 3.86        | (0.44, 0.55)   |
|           |                         |     | 5671         | 1.62        | 5.68        | 1.64        |                |
| <b>D4</b> | <b>Pt-N (10 wt.-%)</b>  | 3.5 | 12355 (12.9) | 6.83 (5.3)  | 23.88 (5.3) | 20.01 (3.7) | 542, 572       |
|           |                         |     | 2378         | 3.40        | 11.88       | 4.50        | (0.44, 0.55)   |
|           |                         |     | 5986         | 1.71        | 6.00        | 1.82        |                |
| <b>E1</b> | <b>Pt-PO (4 wt.-%)</b>  | 3.9 | 23361 (14.1) | 7.92 (6.1)  | 22.06 (6.1) | 13.64 (3.9) | 502, 540, 576  |
|           |                         |     | 3149         | 5.67        | 15.81       | 4.78        | (0.38, 0.54)   |
|           |                         |     | 10145        | 3.66        | 10.18       | 2.66        |                |
| <b>E2</b> | <b>Pt-PO (6 wt.-%)</b>  | 4.1 | 26359 (14.3) | 6.86 (7.1)  | 19.07 (7.1) | 9.41 (5.5)  | 502, 540, 576  |
|           |                         |     | 2964         | 5.35        | 14.88       | 4.49        | (0.38, 0.54)   |
|           |                         |     | 10197        | 3.67        | 10.21       | 2.61        |                |
| <b>E3</b> | <b>Pt-PO (8 wt.-%)</b>  | 3.9 | 26448 (14.3) | 5.12 (7.9)  | 14.27 (7.9) | 8.00 (4.7)  | 502, 540, 576  |
|           |                         |     | 2508         | 4.51        | 12.55       | 3.78        | (0.38, 0.54)   |
|           |                         |     | 9122         | 3.28        | 9.11        | 2.33        |                |
| <b>E4</b> | <b>Pt-PO (10 wt.-%)</b> | 3.9 | 28038 (13.7) | 4.51 (8.5)  | 12.55 (8.5) | 6.20 (5.3)  | 502, 540, 576  |
|           |                         |     | 2362         | 4.24        | 11.80       | 3.58        | (0.38, 0.54)   |
|           |                         |     | 9147         | 3.29        | 9.15        | 2.33        |                |
| <b>F1</b> | <b>Pt-O (4 wt.-%)</b>   | 7.7 | 3510 (16.7)  | 1.31 (10.9) | 2.58 (10.9) | 0.82 (8.3)  | 451, 484, 519, |
|           |                         |     | 480          | 1.21        | 2.40        | 0.63        | 555            |
|           |                         |     | 1733         | 0.88        | 1.74        | 0.38        | (0.26, 0.33)   |
| <b>F2</b> | <b>Pt-O (6 wt.-%)</b>   | 4.9 | 5450 (14.1)  | 4.14 (4.9)  | 8.78 (4.9)  | 5.63 (4.9)  | 444, 484, 520, |
|           |                         |     | 836          | 1.98        | 4.19        | 1.13        | 570            |
|           |                         |     | 2937         | 1.39        | 2.94        | 0.66        | (0.32, 0.34)   |
| <b>F3</b> | <b>Pt-O (8 wt.-%)</b>   | 5.7 | 4512 (14.7)  | 2.52 (5.9)  | 5.35 (5.9)  | 2.93 (5.7)  | 444, 484, 520, |
|           |                         |     | 670          | 1.58        | 3.36        | 0.90        | 564            |
|           |                         |     | 2399         | 1.13        | 2.40        | 0.55        | (0.30, 0.34)   |
| <b>F4</b> | <b>Pt-O (10 wt.-%)</b>  | 4.9 | 7466 (14.7)  | 5.09 (4.9)  | 11.42 (4.9) | 7.32 (4.9)  | 448, 487, 524, |
|           |                         |     | 989          | 2.21        | 4.94        | 1.37        | 587            |
|           |                         |     | 3445         | 1.54        | 3.44        | 0.80        | (0.40, 0.42)   |
| <b>G1</b> | <b>Pt-S (4 wt.-%)</b>   | 4.3 | 14593 (14.3) | 4.01 (6.9)  | 11.20 (6.9) | 6.40 (5.1)  | 450, 508, 540  |
|           |                         |     | 1718         | 3.08        | 8.58        | 2.78        | (0.33, 0.51)   |
|           |                         |     | 5795         | 2.07        | 5.81        | 1.52        |                |
| <b>G2</b> | <b>Pt-S (6 wt.-%)</b>   | 4.1 | 21490 (14.3) | 6.66 (5.7)  | 16.77 (5.7) | 10.08 (4.5) | 455, 508, 544, |
|           |                         |     | 2351         | 4.67        | 11.77       | 3.70        | 585            |
|           |                         |     | 8023         | 3.19        | 8.03        | 2.13        | (0.39, 0.50)   |
| <b>G3</b> | <b>Pt-S (8 wt.-%)</b>   | 4.3 | 20418 (14.9) | 4.94 (6.7)  | 13.85 (6.7) | 8.16 (4.9)  | 450, 508, 544, |
|           |                         |     | 2186         | 3.90        | 10.95       | 3.25        | 584            |

|           |                                     |     |              |             |              |            |                |
|-----------|-------------------------------------|-----|--------------|-------------|--------------|------------|----------------|
|           |                                     |     | 7584         | 2.70        | 7.58         | 1.86       | (0.40, 0.52)   |
| <b>G4</b> | <b>Pt-S</b> (10 wt.-%)              | 3.9 | 30593 (14.7) | 5.92 (7.3)  | 13.80 (7.3)  | 6.58 (6.5) | 452, 508, 550, |
|           |                                     |     | 2474         | 5.31        | 12.40        | 3.81       | 597            |
|           |                                     |     | 9593         | 4.11        | 9.58         | 2.46       | (0.46, 0.48)   |
| <b>H1</b> | <b>Pt-SO<sub>2</sub></b> (4 wt.-%)  | 4.7 | 27121 (17.5) | 8.35 (8.7)  | 19.59 (8.7)  | 7.83 (7.1) | 507, 545, 589  |
|           |                                     |     | 3162         | 6.74        | 15.81        | 3.88       | (0.43, 0.51)   |
|           |                                     |     | 10746        | 4.57        | 10.75        | 2.17       |                |
| <b>H2</b> | <b>Pt-SO<sub>2</sub></b> (6 wt.-%)  | 4.9 | 26234 (16.7) | 4.63 (11.1) | 10.87 (11.1) | 3.63 (8.1) | 509, 545, 590  |
|           |                                     |     | 2085         | 4.43        | 10.41        | 2.63       | (0.43, 0.51)   |
|           |                                     |     | 8316         | 3.55        | 8.34         | 1.79       |                |
| <b>H3</b> | <b>Pt-SO<sub>2</sub></b> (8 wt.-%)  | 4.7 | 26840 (16.1) | 4.67 (10.5) | 10.96 (10.5) | 3.38 (9.7) | 504, 541, 584  |
|           |                                     |     | 2146         | 4.56        | 10.72        | 2.84       | (0.43, 0.50)   |
|           |                                     |     | 8636         | 3.68        | 8.66         | 1.92       |                |
| <b>H4</b> | <b>Pt-SO<sub>2</sub></b> (10 wt.-%) | 4.9 | 18120 (16.1) | 2.83 (11.1) | 5.05 (11.1)  | 1.55 (9.7) | 510, 547, 631  |
|           |                                     |     | 992          | 2.80        | 5.00         | 1.32       | (0.47, 0.48)   |
|           |                                     |     | 4290         | 2.41        | 4.29         | 0.96       |                |

<sup>a</sup> Maximum values of the devices. Values in parentheses are the voltages at which they were obtained. <sup>b</sup> Values collected at 20 mA cm<sup>-2</sup>. <sup>c</sup> Values collected at 100 mA cm<sup>-2</sup>. <sup>d</sup> Values were collected at 5-6 V and CIE coordinates (x, y) are shown in parentheses.

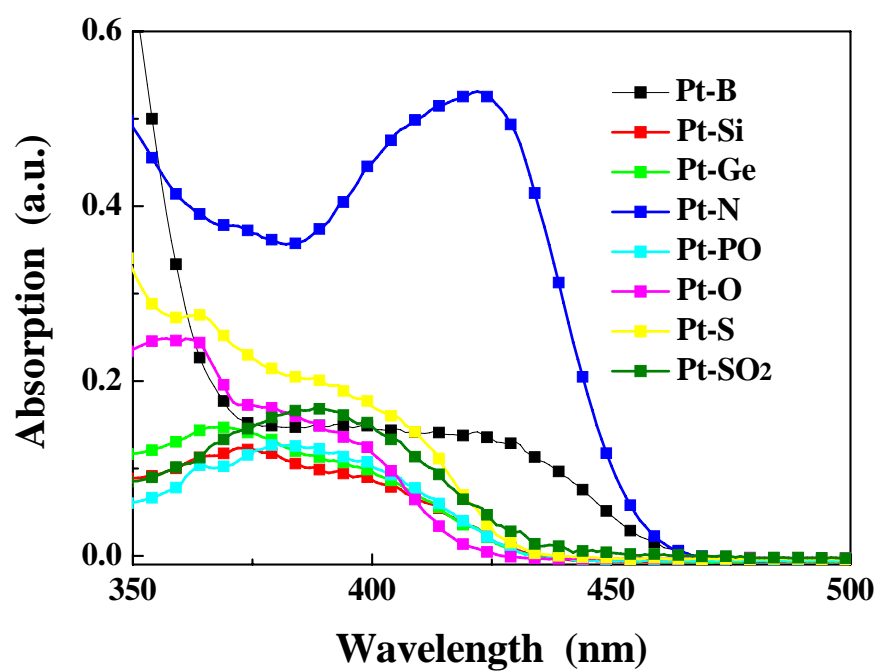

**Fig. S1** An expanded view of the UV/Vis spectra in the visible region for the new platinum complexes at 293 K.

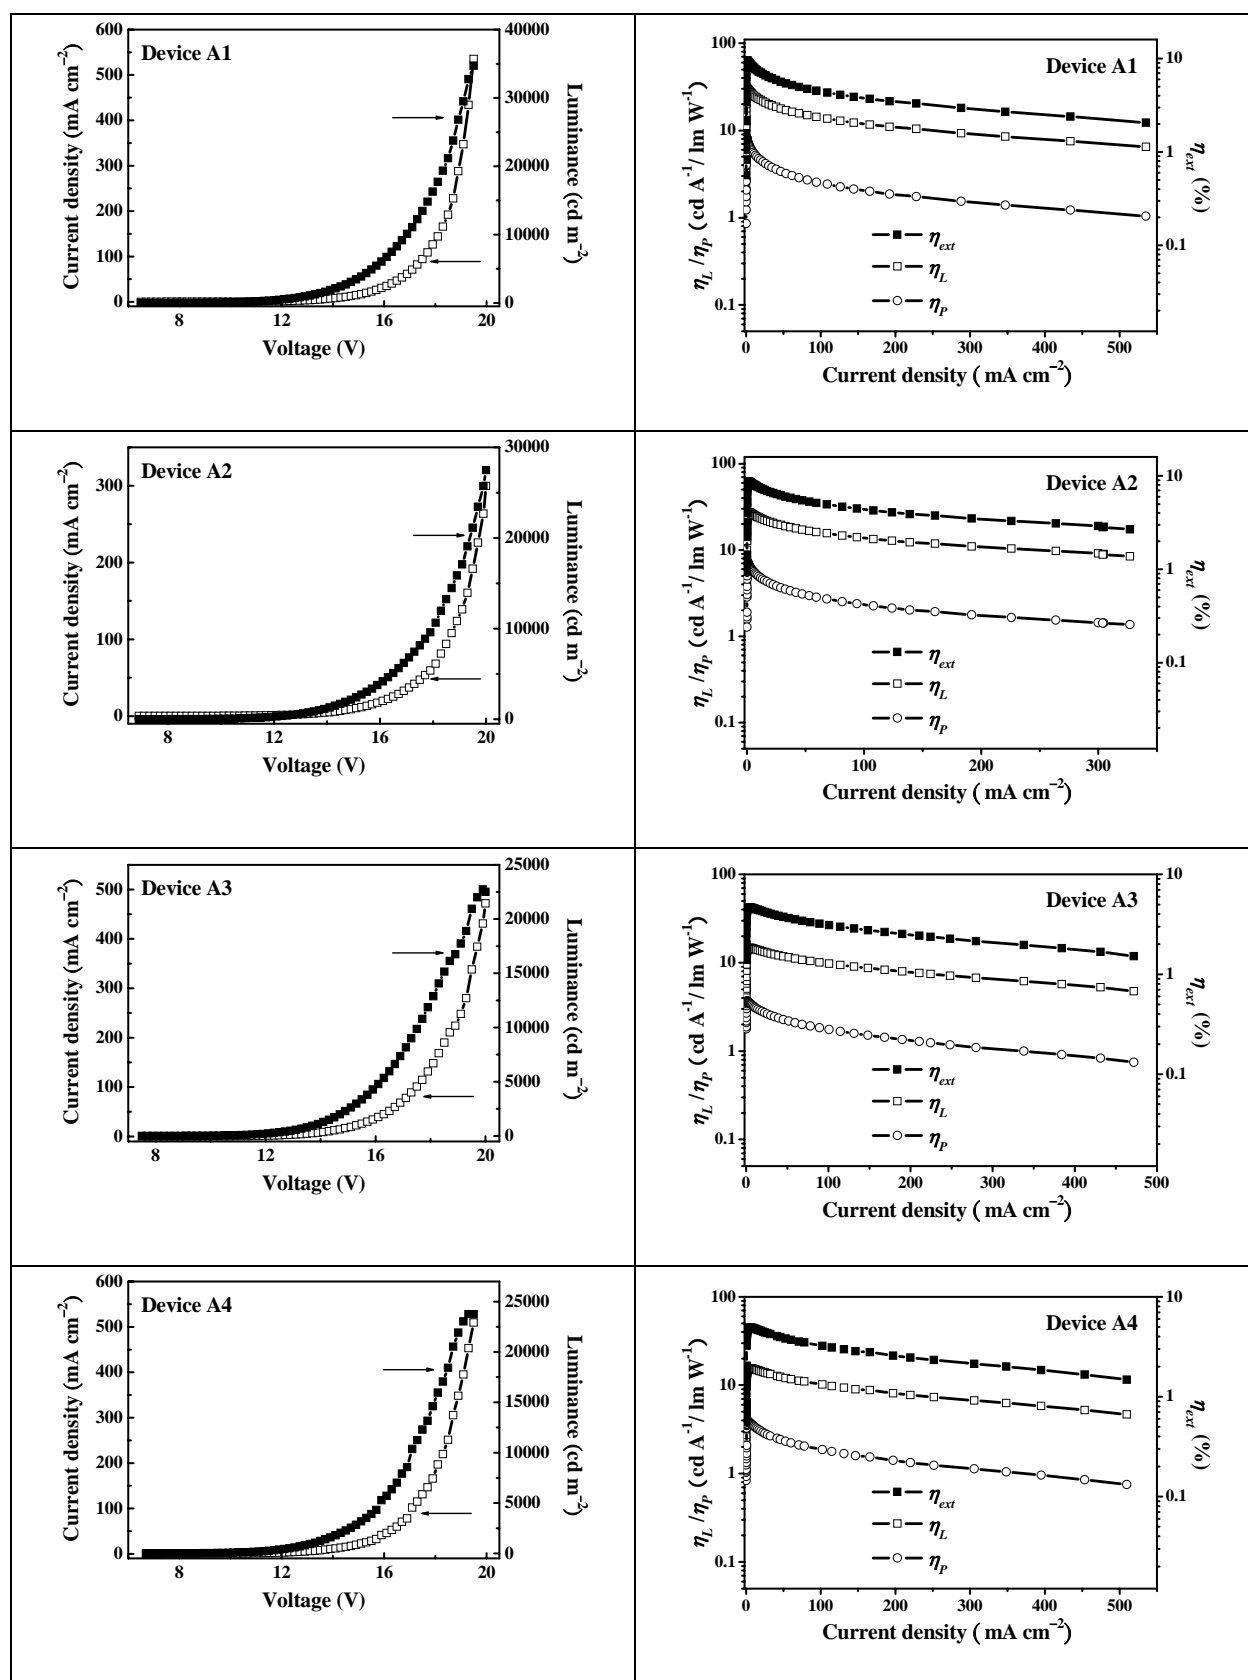

**Fig. S2** The  $J$ - $V$ - $L$  curves and the efficiency versus current density relationship for devices A1–A4 with Pt-B as emitter.

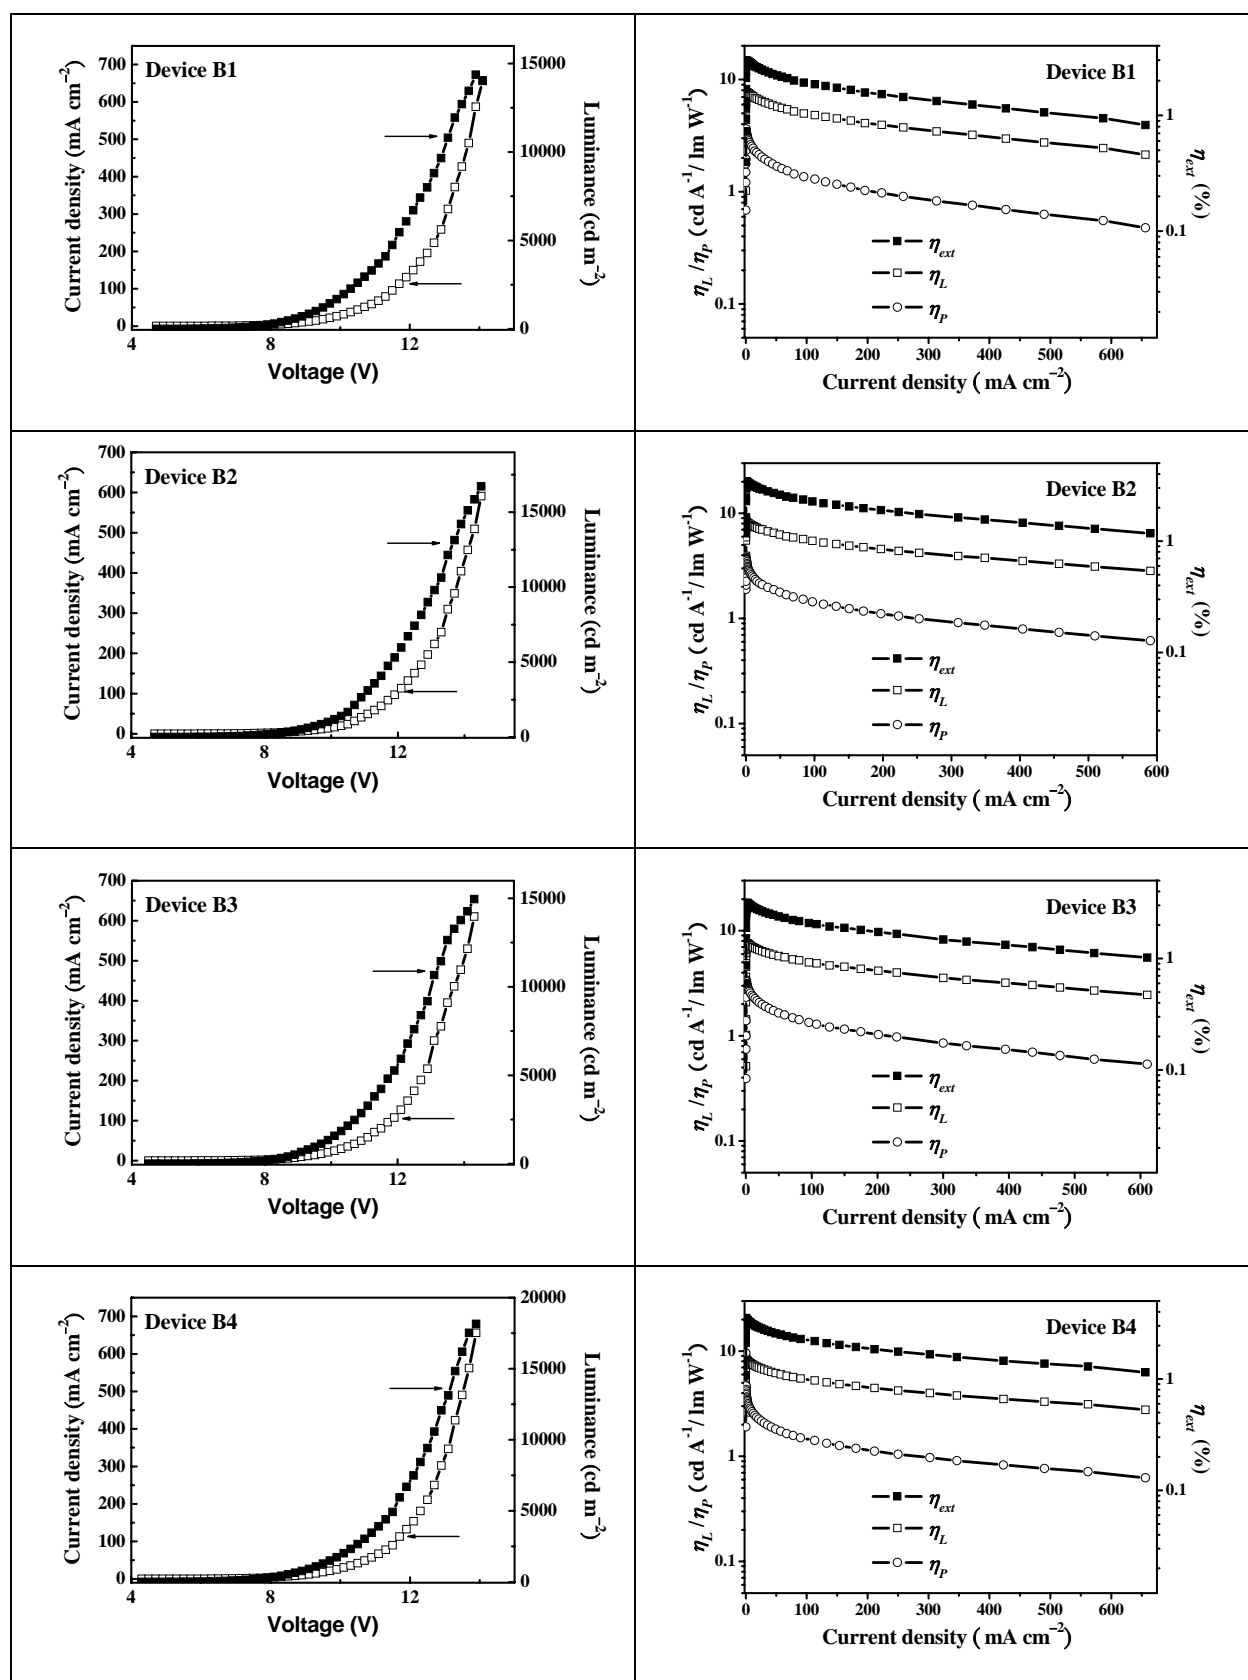

**Fig. S3** The  $J$ - $V$ - $L$  curves and the efficiency versus current density relationship for devices B1–B4 with Pt-Si as emitter.



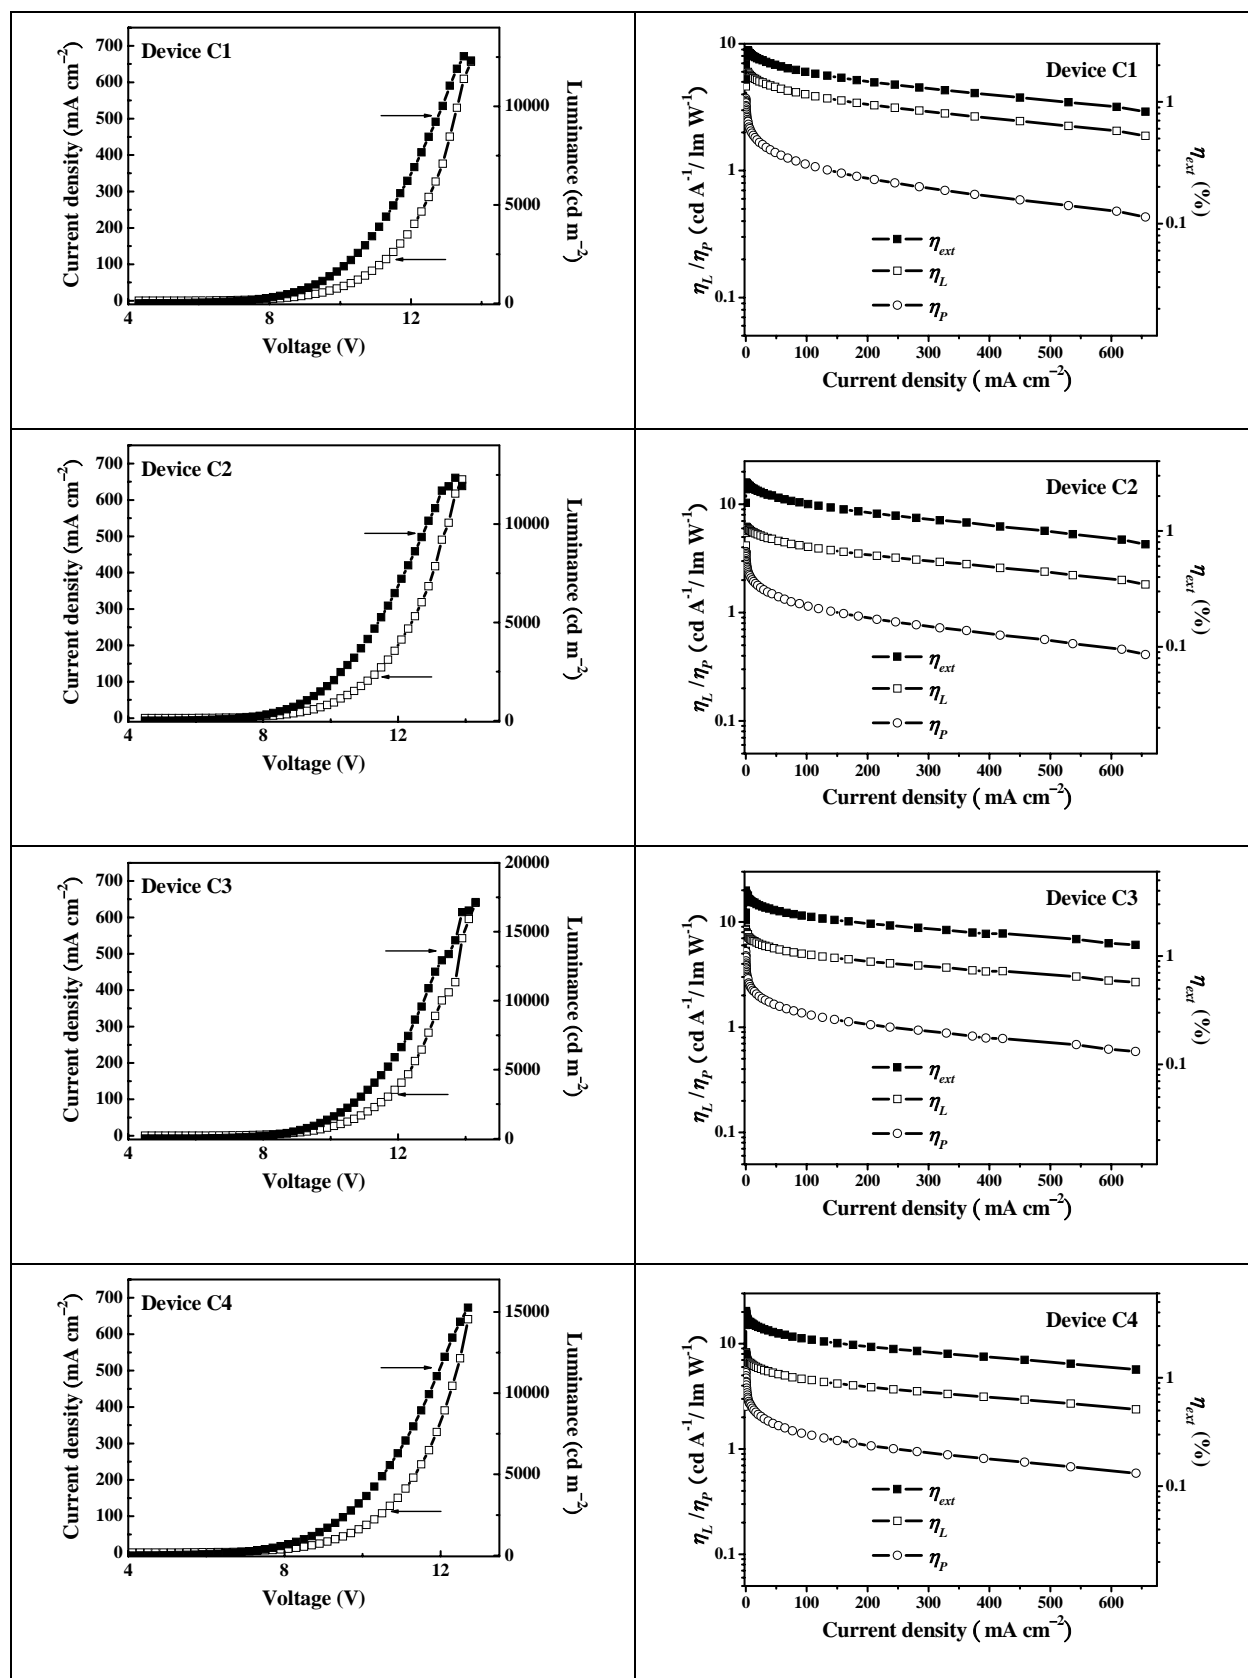

**Fig. S4** The  $J$ - $V$ - $L$  curves and the efficiency versus current density relationship for devices C1-C4 with Pt-Ge as emitter.

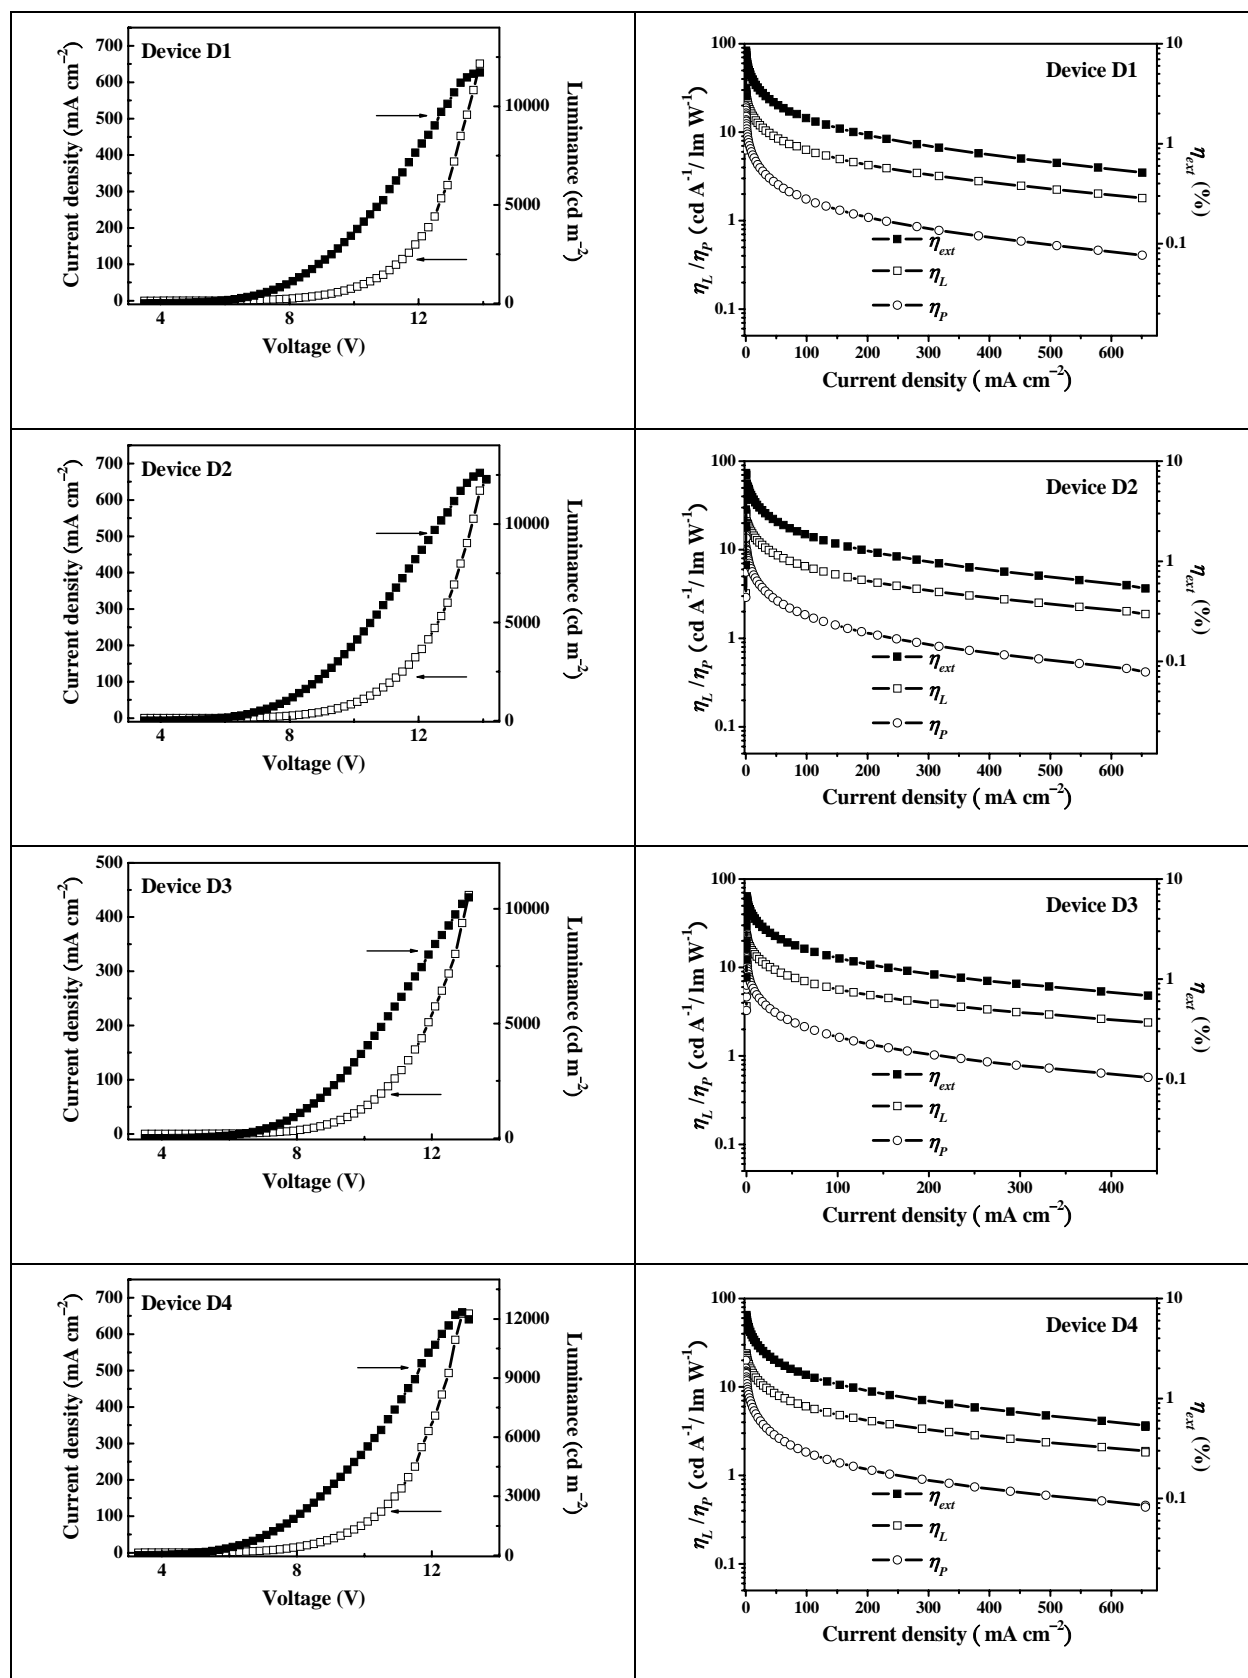

**Fig. S5** The  $J$ - $V$ - $L$  curves and the efficiency versus current density relationship for devices D1-D4 with Pt-N as emitter.

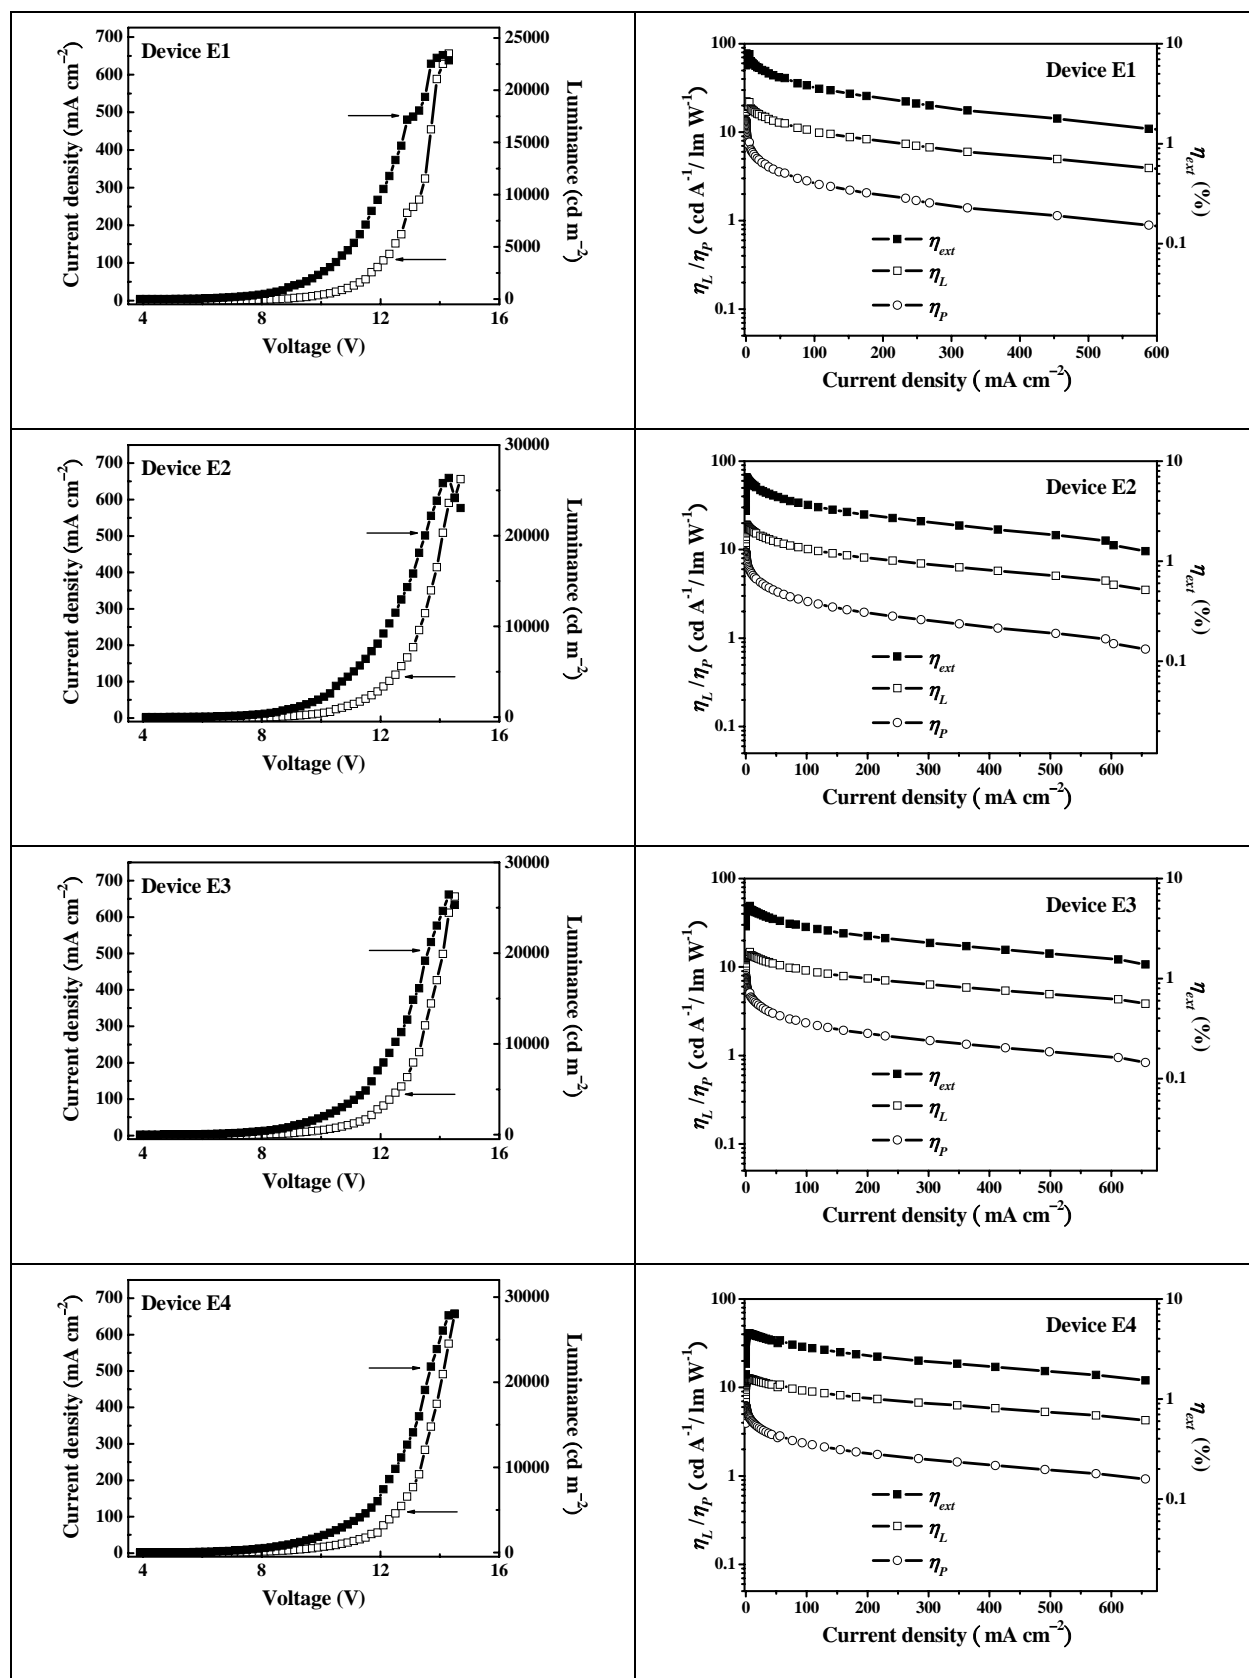

**Fig. S6** The  $J$ - $V$ - $L$  curves and the efficiency versus current density relationship for devices E1-E4 with Pt-PO as emitter.

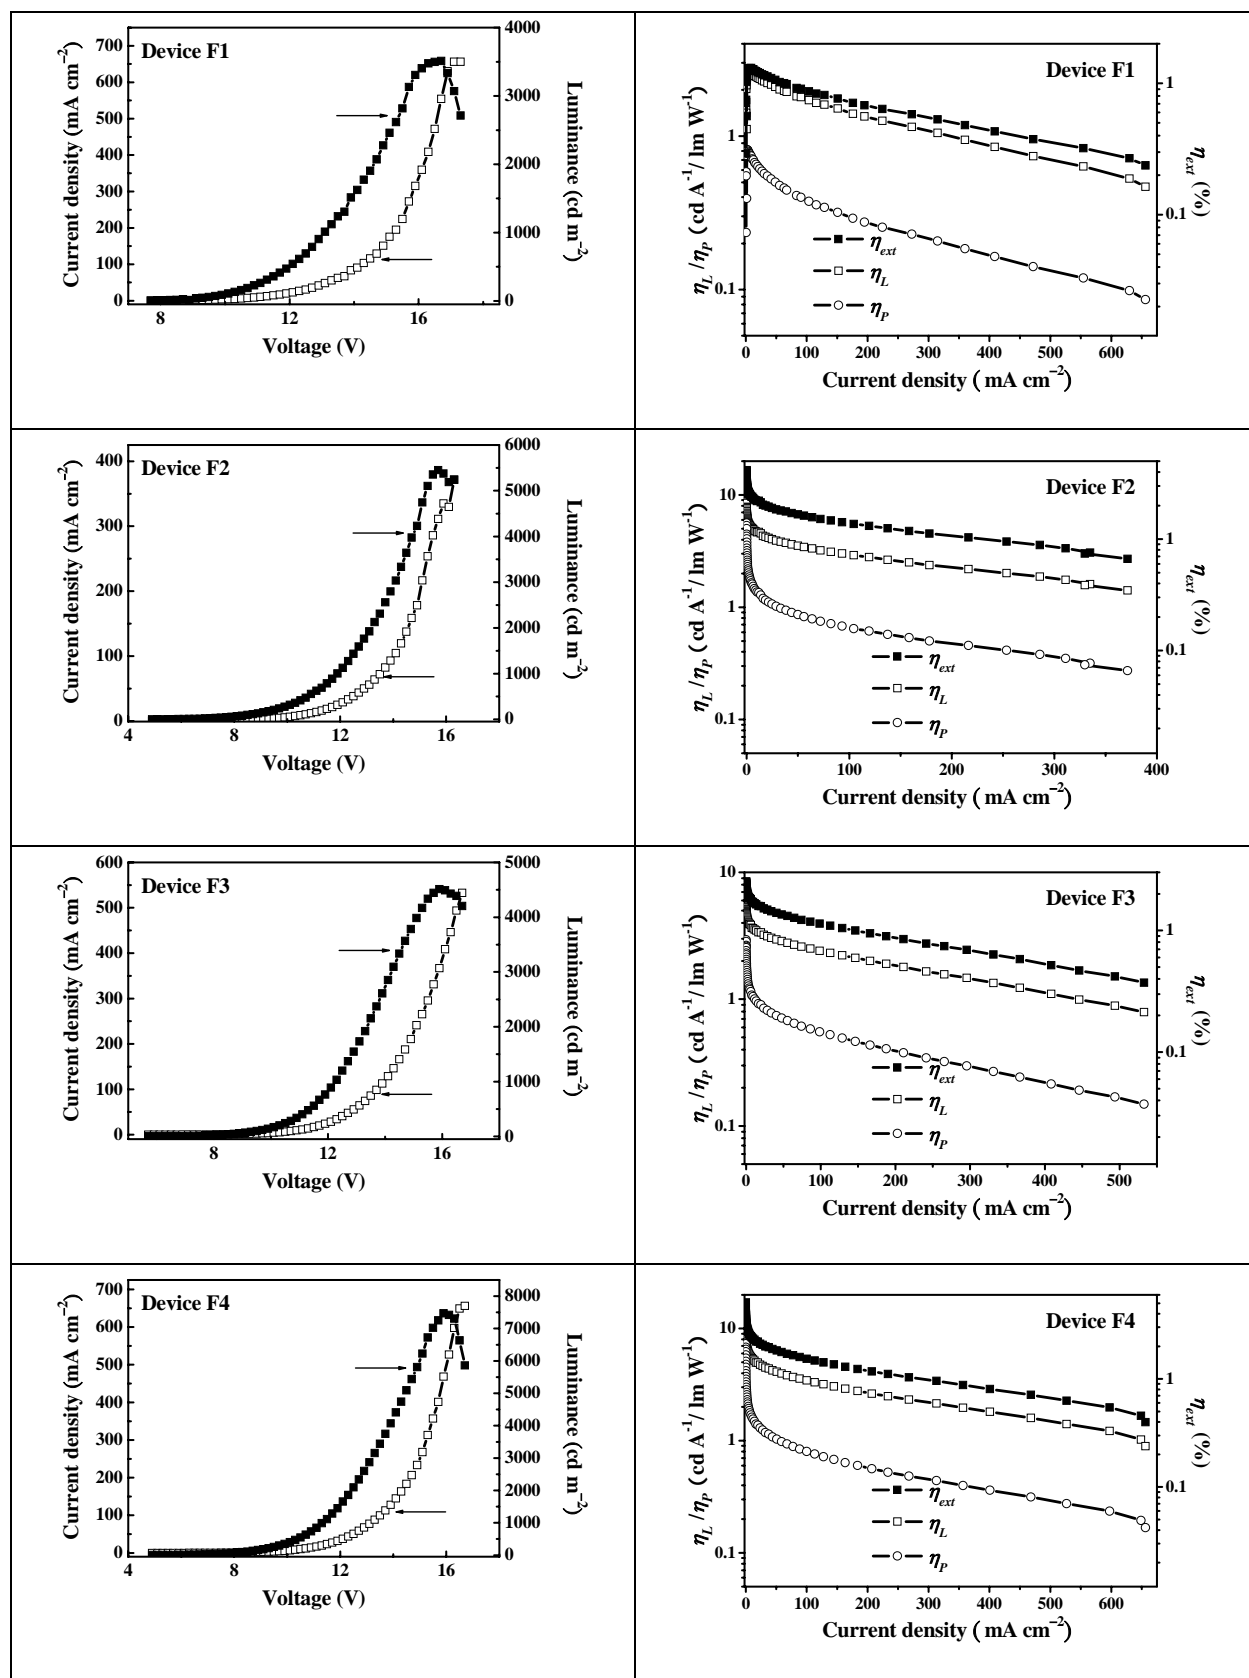

**Fig. S7** The  $J$ - $V$ - $L$  curves and the efficiency versus current density relationship for devices F1-F4 with Pt-O as emitter.

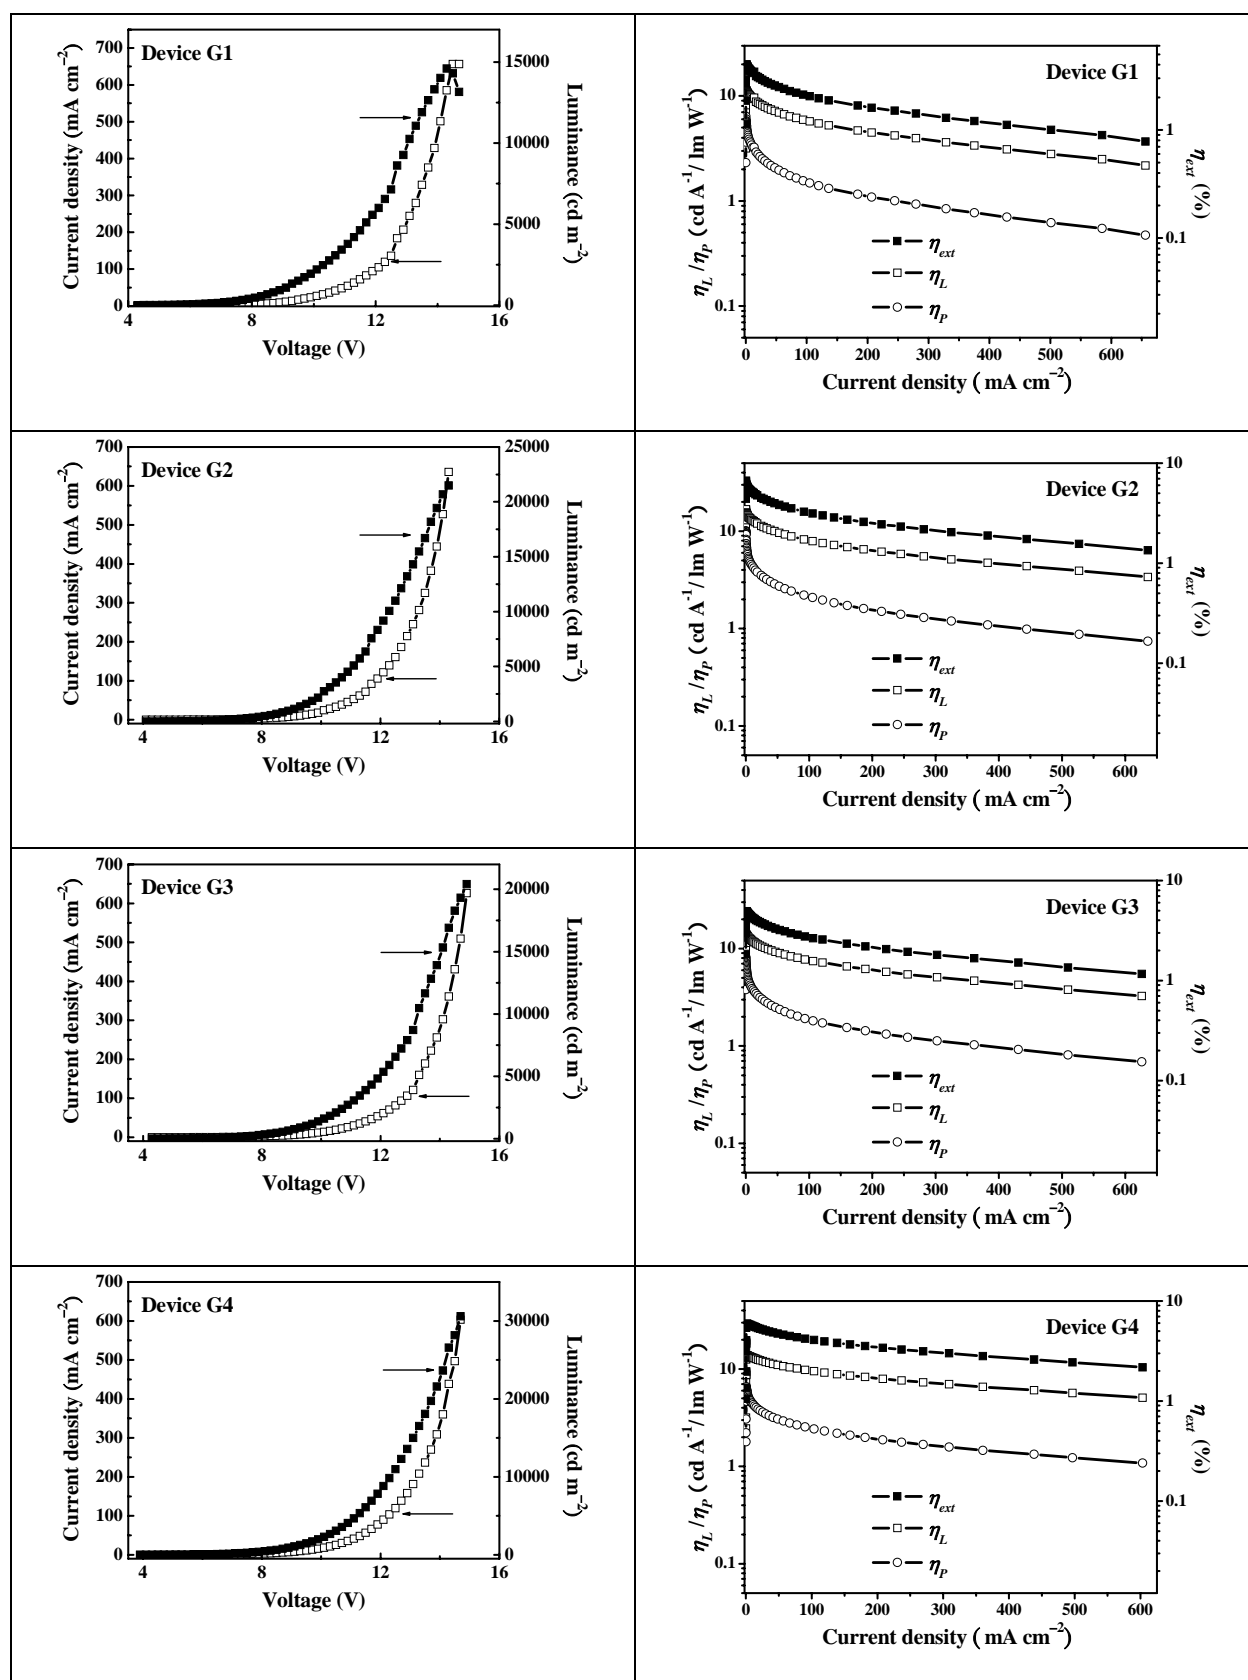

**Fig. S8** The  $J$ - $V$ - $L$  curves and the efficiency versus current density relationship for devices G1-G4 with Pt-S as emitter.

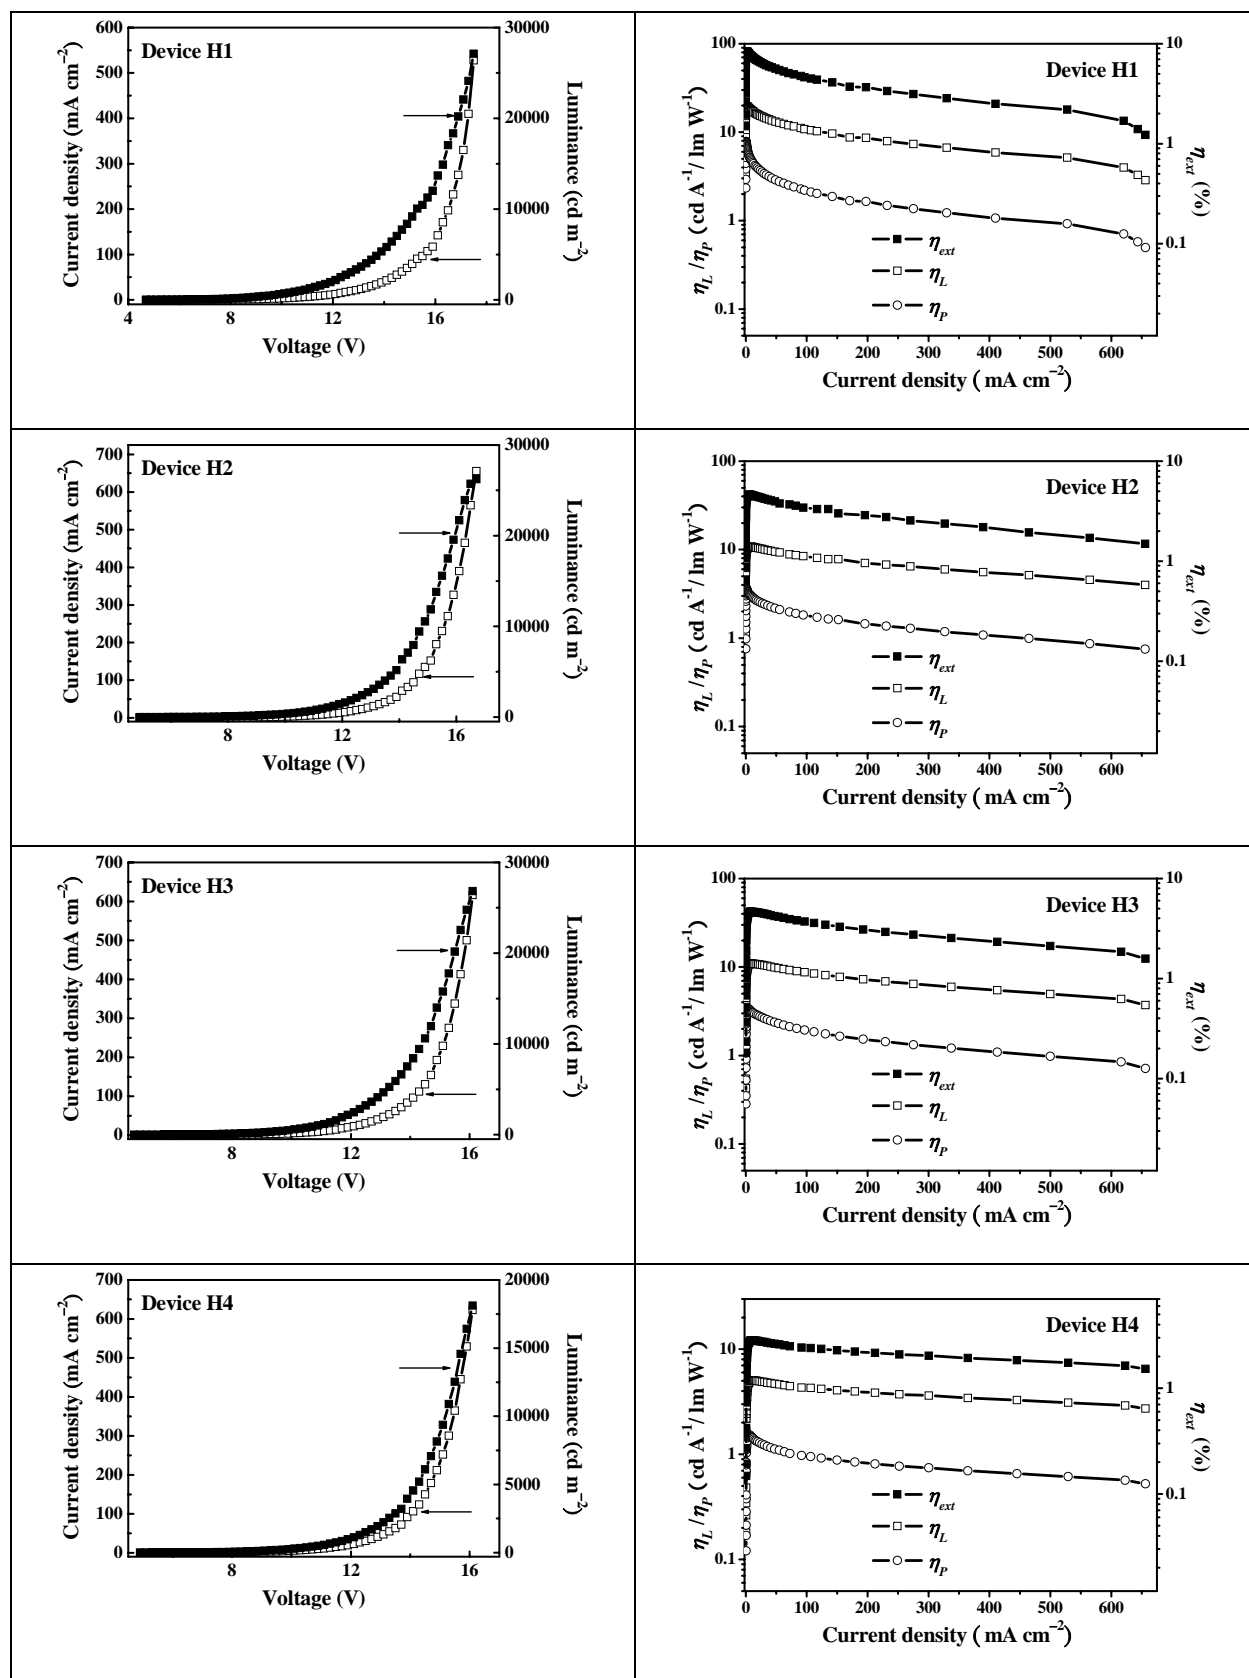

**Fig. S9** The  $J$ - $V$ - $L$  curves and the efficiency versus current density relationship for devices H1-H4 with Pt-SO<sub>2</sub> as emitter.

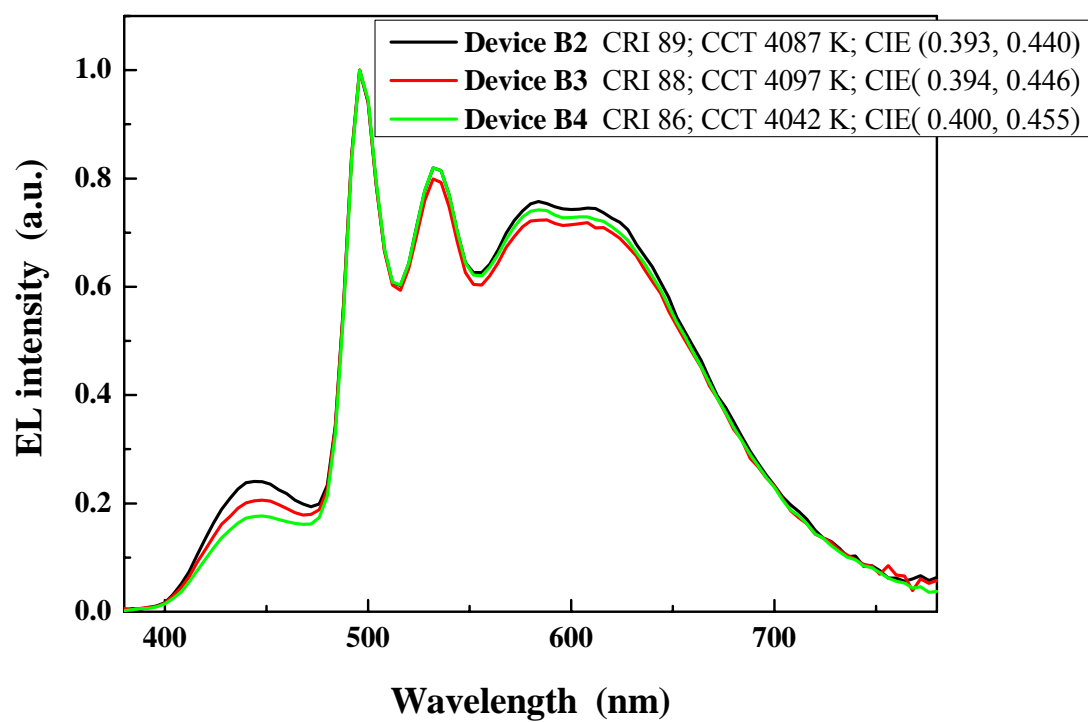

**Fig. S10** EL spectra for the devices **B2–B4** at 6 V.

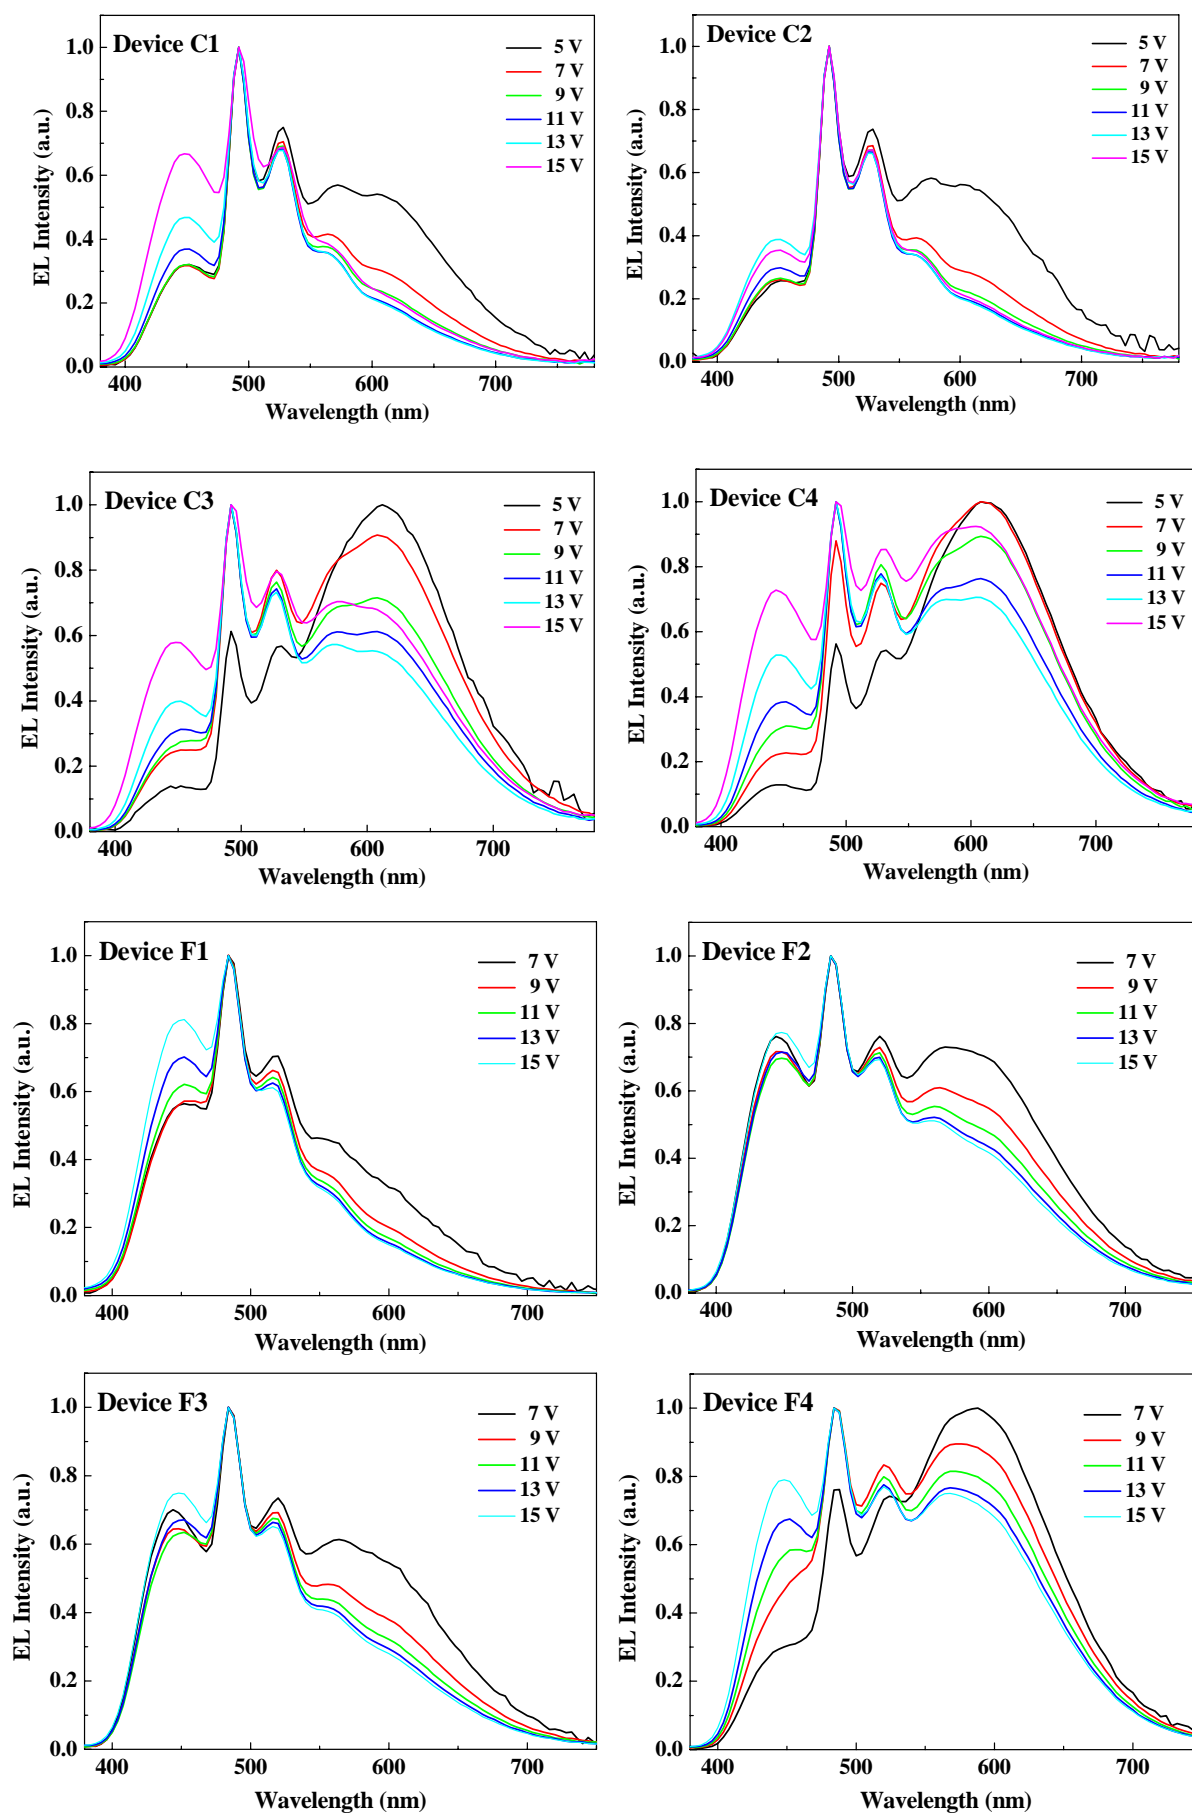

**Fig. S11** EL spectra for the devices **C1–C4** and devices **F1–F4** at different driving voltages.



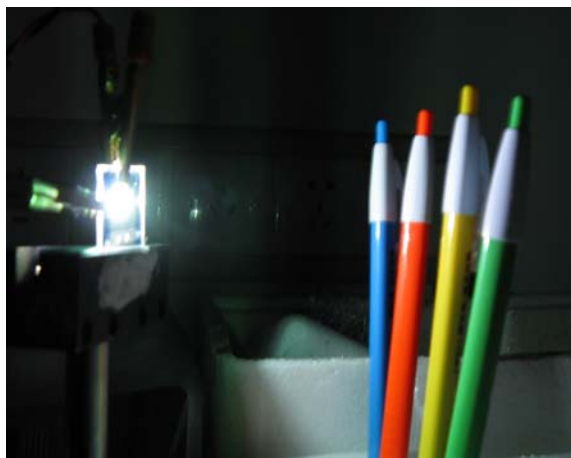

(a)

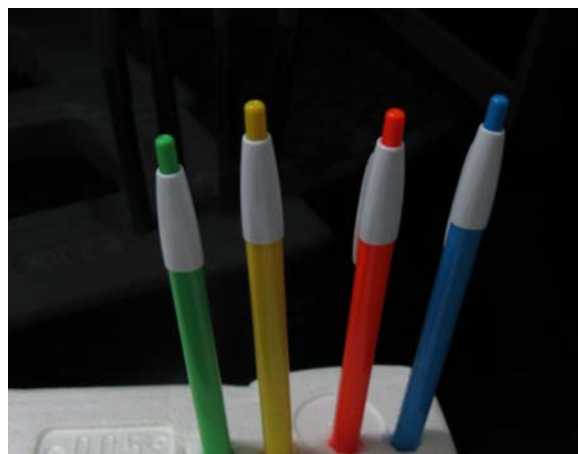

(b)

**Fig. S12** The image of the objects with different perceived colors (blue-green-yellow-red) when they are illuminated under (a) our WOLEDs and (b) the sunlight, showing an excellent true color reproduction.

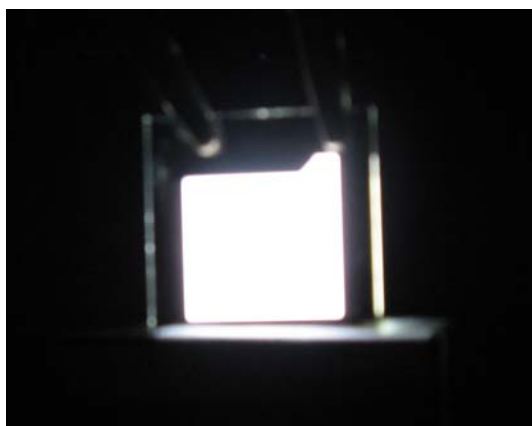

**Fig. S13** A representative photo of a single-dopant WOLED fabricated from **Pt-Ge**.
